# Supplementary material for: Detection of signs of disease in external photographs of the eyes via deep learning
Source: Springer Nature journal article supplement (doi:10.1038/s41551-022-00867-5), 2022-03-29
Supplement: 41551_2022_867_MOESM1_ESM.pdf [file 41551_2022_867_MOESM1_ESM.pdf]

**Supplementary information**

---

**Detection of signs of disease in external  
photographs of the eyes via deep learning**

---

In the format provided by the  
authors and unedited

## Contents

|                                                                                                                                                             |    |
|-------------------------------------------------------------------------------------------------------------------------------------------------------------|----|
| Supplementary Note 1. Pupil / iris pupil segmentation model.                                                                                                | 2  |
| Supplementary Table 1   Area under receiver operating characteristics curve (AUC) of our models for the four validation sets.                               | 3  |
| Supplementary Table 2   Performance of adding predicted pupil size to baseline characteristics models for prespecified primary prediction tasks and lipids. | 6  |
| Supplementary Table 3   Adjusted analysis including pupil size.                                                                                             | 8  |
| Supplementary Table 4   Adjusted analysis for diabetic eye disease targets including HbA1c.                                                                 | 14 |
| Supplementary Table 5   Subgroup analysis for HbA1c $\geq$ 9% in validation set A.                                                                          | 16 |
| Supplementary Table 6   Subgroup analysis for Tch $\geq$ 240 in validation set A.                                                                           | 17 |
| Supplementary Table 7   Subgroup analysis for Tg $\geq$ 200 in validation set A.                                                                            | 18 |
| Supplementary Table 8   Subgroup analysis for moderate+ diabetic retinopathy (DR) in validation set A.                                                      | 19 |
| Supplementary Table 9   Subgroup analysis for diabetic macular edema (DME) in validation set A.                                                             | 20 |
| Supplementary Table 10   Subgroup analysis for vision-threatening diabetic retinopathy (VTDR) in validation set A.                                          | 21 |
| Supplementary Table 11   Subgroup analysis for cataract in validation set A.                                                                                | 22 |
| Supplementary Table 12   Subgroup analysis for HbA1c $\geq$ 7 in validation set D.                                                                          | 23 |
| Supplementary Table 13   Subgroup analysis for HbA1c $\geq$ 9 in validation set D.                                                                          | 24 |
| Supplementary Table 14   Hyperparameters.                                                                                                                   | 25 |
| Supplementary Figure 1. Pupil / iris segmentation tool.                                                                                                     | 26 |
| Supplementary Figure 2. Accuracy of pupil size predictions by pupil/iris segmentation model.                                                                | 27 |

**Supplementary Note 1. Pupil / iris pupil segmentation model.**

A deep learning model was trained for pupil / iris pupil segmentation because most existing methods were developed to detect either the pupil or iris, and not for these magnified images with circular cutouts. The iris and pupils were each modeled as axis-aligned ellipses with 4 parameters each: x / y center coordinates and x / y dimensions. All 8 parameters were represented as floating point numbers in the range [0,1], representing the fraction of the image width or height. A deep learning model was trained using a L2 regression loss to take as input the external eye image and output these 8 parameters. The architecture was otherwise identical to the disease prediction models. This model's hyperparameters are detailed in Supplementary Table 14, and results are presented in Supplementary Figure 6.

**Supplementary Table 1 | Area under receiver operating characteristics curve (AUC) of our models for the four validation sets.**

(A) validation set A, (B) validation set B, (C) validation set C, and (D) Validation set D. Bold indicates  $p < 0.05$ . †:prespecified primary prediction tasks.

**A**

| Target             | Total | Positive (%)  | Baseline characteristics | External image   | Improvement    | P-value             |
|--------------------|-------|---------------|--------------------------|------------------|----------------|---------------------|
| HbA1c $\geq 7\%$   | 21183 | 13544 (63.9%) | 65.0 (64.3-65.8)         | 66.9 (66.1-67.6) | 1.8 (1.0-2.7)  | <b>p &lt; 0.001</b> |
| HbA1c $\geq 8\%$   | 21183 | 9347 (44.1%)  | 65.2 (64.5-66.0)         | 69.1 (68.4-69.8) | 3.9 (3.1-4.6)  | <b>p &lt; 0.001</b> |
| HbA1c $\geq 9\%$ † | 21183 | 6537 (30.9%)  | 64.8 (64.0-65.6)         | 70.0 (69.3-70.8) | 5.2 (4.5-6.0)  | <b>p &lt; 0.001</b> |
| Tch $\geq 200$     | 9318  | 2913 (31.3%)  | 55.5 (54.3-56.8)         | 57.3 (56.1-58.6) | 1.8 (0.4-3.3)  | <b>p = 0.007</b>    |
| Tch $\geq 240$     | 9318  | 984 (10.6%)   | 55.1 (53.3-56.9)         | 59.1 (57.3-61.0) | 4.0 (1.8-6.3)  | <b>p &lt; 0.001</b> |
| Tg $\geq 150$      | 9104  | 4674 (51.3%)  | 60.9 (59.7-62.0)         | 63.3 (62.1-64.4) | 2.4 (1.4-3.4)  | <b>p &lt; 0.001</b> |
| Tg $\geq 200$      | 9104  | 2894 (31.8%)  | 61.7 (60.5-62.9)         | 63.6 (62.4-64.8) | 1.9 (0.9-2.9)  | <b>p &lt; 0.001</b> |
| Tg $\geq 500$      | 9104  | 323 (3.5%)    | 66.3 (63.4-69.1)         | 68.1 (65.3-70.9) | 1.8 (-0.3-3.9) | <b>p = 0.045</b>    |
| Mild+ DR           | 26950 | 5144 (19.1%)  | 68.9 (68.1-69.7)         | 70.5 (69.7-71.3) | 1.6 (0.6-2.6)  | <b>p = 0.001</b>    |
| Moderate+ DR†      | 26950 | 3247 (12.0%)  | 71.0 (70.0-72.0)         | 75.0 (74.1-75.9) | 4.0 (2.8-5.2)  | <b>p &lt; 0.001</b> |
| Severe+ DR         | 26950 | 404 (1.5%)    | 74.5 (72.0-76.9)         | 82.4 (80.6-84.3) | 8.0 (5.0-11.0) | <b>p &lt; 0.001</b> |
| DME†               | 26950 | 797 (3.0%)    | 71.2 (69.4-73.0)         | 77.9 (76.3-79.5) | 6.7 (4.6-8.9)  | <b>p &lt; 0.001</b> |
| VTDR†              | 26950 | 1042 (3.9%)   | 72.7 (71.1-74.2)         | 79.2 (77.9-80.5) | 6.5 (4.6-8.4)  | <b>p &lt; 0.001</b> |
| Cataract           | 27415 | 639 (2.3%)    | 76.5 (74.7-78.2)         | 86.4 (84.9-87.8) | 9.9 (8.2-11.6) | <b>p &lt; 0.001</b> |

**B**

| <b>Target</b> | <b>Total</b> | <b>Positive (%)</b> | <b>Baseline characteristics</b> | <b>External image</b> | <b>Improvement</b> | <b>P-value</b>      |
|---------------|--------------|---------------------|---------------------------------|-----------------------|--------------------|---------------------|
| HbA1c ≥ 7%    | 4120         | 2819 (68.4%)        | 69.6 (67.9-71.3)                | 74.5 (73.0-76.1)      | 5.0 (3.1-6.8)      | <b>p &lt; 0.001</b> |
| HbA1c ≥ 8%    | 4120         | 1991 (48.3%)        | 68.4 (66.8-70.0)                | 73.7 (72.2-75.2)      | 5.3 (3.7-6.9)      | <b>p &lt; 0.001</b> |
| HbA1c ≥ 9%†   | 4120         | 1455 (35.3%)        | 66.5 (64.8-68.2)                | 73.4 (71.8-75.0)      | 6.9 (5.3-8.5)      | <b>p &lt; 0.001</b> |
| Tch ≥ 200     | 859          | 219 (25.5%)         | 54.3 (50.1-58.6)                | 58.5 (54.1-63.0)      | 4.2 (-0.9-9.3)     | p = 0.053           |
| Tch ≥ 240     | 859          | 82 (9.5%)           | 57.3 (50.8-63.8)                | 57.9 (51.1-64.7)      | 0.6 (-8.3-9.5)     | p = 0.451           |
| Tg ≥ 150      | 843          | 414 (49.1%)         | 58.2 (54.4-62.1)                | 61.9 (58.2-65.7)      | 3.7 (-0.0-7.4)     | <b>p = 0.026</b>    |
| Tg ≥ 200      | 843          | 260 (30.8%)         | 59.2 (55.1-63.3)                | 62.7 (58.7-66.7)      | 3.5 (-0.4-7.3)     | <b>p = 0.038</b>    |
| Tg ≥ 500      | 843          | 21 (2.5%)*          | 69.3 (57.2-81.4)                | 63.1 (50.1-76.2)      | -6.1 (-16.1-3.8)   | p = 0.887           |
| Mild+ DR      | 4982         | 1509 (30.3%)        | 75.0 (73.6-76.5)                | 80.2 (78.9-81.6)      | 5.2 (3.5-6.9)      | <b>p &lt; 0.001</b> |
| Moderate+ DR† | 4982         | 1172 (23.5%)        | 77.2 (75.7-78.8)                | 84.0 (82.7-85.3)      | 6.8 (5.0-8.5)      | <b>p &lt; 0.001</b> |
| Severe+ DR    | 4982         | 455 (9.1%)          | 76.3 (74.1-78.5)                | 88.7 (87.3-90.1)      | 12.4 (10.0-14.8)   | <b>p &lt; 0.001</b> |
| DME†          | 4982         | 394 (7.9%)          | 76.8 (74.5-79.1)                | 84.7 (82.9-86.5)      | 7.9 (5.1-10.6)     | <b>p &lt; 0.001</b> |
| VTDR†         | 4982         | 617 (12.4%)         | 76.9 (75.0-78.8)                | 86.7 (85.3-88.2)      | 9.8 (7.6-12.0)     | <b>p &lt; 0.001</b> |
| Cataract      | 5058         | 268 (5.3%)          | 74.3 (71.5-77.2)                | 93.2 (91.6-94.8)      | 18.9 (16.0-21.8)   | <b>p &lt; 0.001</b> |

**C**

| Target        | Total | Positive (%) | Baseline characteristics | External image   | Improvement      | P-value             |
|---------------|-------|--------------|--------------------------|------------------|------------------|---------------------|
| HbA1c ≥ 7%    | 8995  | 5119 (56.9%) | 57.8 (56.6-58.9)         | 64.0 (62.9-65.1) | 6.2 (4.9-7.6)    | <b>p &lt; 0.001</b> |
| HbA1c ≥ 8%    | 8995  | 2947 (32.8%) | 61.9 (60.6-63.1)         | 66.3 (65.1-67.5) | 4.5 (3.2-5.7)    | <b>p &lt; 0.001</b> |
| HbA1c ≥ 9%†   | 8995  | 1766 (19.6%) | 65.2 (63.8-66.6)         | 69.3 (68.0-70.7) | 4.2 (2.8-5.5)    | <b>p &lt; 0.001</b> |
| Tch ≥ 200     | 9304  | 1935 (20.8%) | 61.0 (59.6-62.4)         | 60.8 (59.3-62.2) | -0.3 (-1.4-0.8)  | p = 0.679           |
| Tch ≥ 240     | 9304  | 580 (6.2%)   | 62.7 (60.3-65.0)         | 62.3 (60.0-64.7) | -0.3 (-2.1-1.5)  | p = 0.639           |
| Tg ≥ 150      | 9280  | 3825 (41.2%) | 53.4 (52.2-54.6)         | 65.4 (64.3-66.5) | 12.0 (10.4-13.6) | <b>p &lt; 0.001</b> |
| Tg ≥ 200      | 9280  | 2261 (24.4%) | 55.5 (54.2-56.9)         | 66.3 (65.1-67.6) | 10.8 (9.1-12.5)  | <b>p &lt; 0.001</b> |
| Tg ≥ 500      | 9280  | 205 (2.2%)   | 65.2 (61.6-68.8)         | 70.4 (66.9-74.0) | 5.3 (1.6-8.9)    | <b>p = 0.002</b>    |
| Mild+ DR      | 9518  | 992 (10.4%)  | 52.9 (51.0-54.8)         | 71.5 (69.7-73.3) | 18.6 (16.0-21.2) | <b>p &lt; 0.001</b> |
| Moderate+ DR† | 9518  | 454 (4.8%)   | 55.1 (52.4-57.8)         | 76.8 (74.6-79.0) | 21.7 (18.2-25.2) | <b>p &lt; 0.001</b> |
| Severe+ DR    | 9518  | 203 (2.1%)   | 54.5 (50.7-58.4)         | 79.5 (76.6-82.5) | 25.0 (19.9-30.1) | <b>p &lt; 0.001</b> |
| DME†          | 9528  | 119 (1.2%)   | 66.3 (61.6-71.0)         | 79.5 (75.5-83.6) | 13.3 (7.7-18.9)  | <b>p &lt; 0.001</b> |
| VTDR†         | 9528  | 287 (3.0%)   | 57.8 (54.6-61.1)         | 81.1 (78.6-83.6) | 23.3 (19.2-27.4) | <b>p &lt; 0.001</b> |

**D**

| Target     | Total | Positive (%) | Baseline characteristics | External image   | Improvement      | P-value             |
|------------|-------|--------------|--------------------------|------------------|------------------|---------------------|
| HbA1c ≥ 7% | 3200  | 1152 (36.0%) | 55.9 (53.9-57.9)         | 64.3 (62.3-66.3) | 8.4 (5.3-11.5)   | <b>p &lt; 0.001</b> |
| HbA1c ≥ 8% | 3200  | 623 (19.5%)  | 55.9 (53.4-58.4)         | 66.0 (63.6-68.3) | 10.1 (7.1-13.0)  | <b>p &lt; 0.001</b> |
| HbA1c ≥ 9% | 3200  | 357 (11.2%)  | 59.8 (56.7-62.8)         | 67.6 (64.7-70.5) | 7.8 (4.5-11.1)   | <b>p &lt; 0.001</b> |
| Tch ≥ 200  | 4561  | 1171 (25.7%) | 62.4 (60.6-64.2)         | 60.5 (58.6-62.3) | -1.9 (-3.4--0.4) | p = 0.993           |
| Tch ≥ 240  | 4561  | 343 (7.5%)   | 60.5 (57.4-63.6)         | 58.1 (55.0-61.3) | -2.4 (-5.1-0.4)  | p = 0.954           |
| Tg ≥ 150   | 4590  | 1332 (29.0%) | 55.9 (54.1-57.7)         | 65.3 (63.6-67.1) | 9.5 (7.1-11.8)   | <b>p &lt; 0.001</b> |
| Tg ≥ 200   | 4590  | 726 (15.8%)  | 56.3 (54.1-58.5)         | 67.1 (64.9-69.2) | 10.8 (8.0-13.6)  | <b>p &lt; 0.001</b> |
| Tg ≥ 500   | 4590  | 49 (1.1%)*   | 64.6 (57.2-71.9)         | 65.7 (58.1-73.4) | 1.2 (-6.0-8.3)   | p = 0.374           |

Abbreviations: DR = diabetic retinopathy; DME = diabetic macular edema; HbA1c = hemoglobin A1c (glycated hemoglobin). \*Note: fewer than 50 positive examples.

**Supplementary Table 2 | Performance of adding predicted pupil size to baseline characteristics models for prespecified primary prediction tasks and lipids in (A) validation set A, (B) validation set B, (C) validation set C and (D) validation set D.**

Note that per the other analyses, validation sets C and D had the baseline models fit directly on the validation set, and so the corresponding AUCs are over-estimates. Bold indicates  $p < 0.05$ . †:prespecified primary prediction tasks.

**A**

| Target        | Total | Positive (%) | Baseline characteristics | Baseline characteristics + pupil size | DLS (external eye image) | Improvement     | P-value for improvement |
|---------------|-------|--------------|--------------------------|---------------------------------------|--------------------------|-----------------|-------------------------|
| HbA1c > 9%†   | 21183 | 6537 (30.9%) | 64.8 (64.0-65.6)         | 65.1 (64.3-65.8)                      | 70.1 (69.3-70.8)         | 5.0 (4.3-5.7)   | <b>p &lt; 0.001</b>     |
| Tch ≥ 240     | 9320  | 986 (10.6%)  | 55.0 (53.2-56.9)         | 54.6 (52.8-56.4)                      | 59.1 (57.3-61.0)         | 4.5 (2.2-6.8)   | <b>p &lt; 0.001</b>     |
| Tg ≥ 200      | 9106  | 2894 (31.8%) | 61.7 (60.5-62.9)         | 61.8 (60.5-63.0)                      | 63.6 (62.4-64.8)         | 1.8 (0.8-2.9)   | <b>p &lt; 0.001</b>     |
| Moderate+ DR† | 26950 | 3249 (12.1%) | 71.0 (70.0-71.9)         | 71.5 (70.5-72.4)                      | 75.0 (74.1-75.9)         | 3.5 (2.4-4.7)   | <b>p &lt; 0.001</b>     |
| DME†          | 26950 | 797 (3.0%)   | 71.2 (69.4-73.0)         | 71.8 (70.1-73.5)                      | 77.9 (76.3-79.5)         | 6.2 (4.1-8.2)   | <b>p &lt; 0.001</b>     |
| VTDR†         | 26950 | 1042 (3.9%)  | 72.7 (71.1-74.2)         | 73.4 (72.0-74.9)                      | 79.2 (77.9-80.5)         | 5.8 (4.0-7.5)   | <b>p &lt; 0.001</b>     |
| Cataract      | 27415 | 640 (2.3%)   | 76.4 (74.7-78.1)         | 76.1 (74.4-77.8)                      | 86.4 (84.9-87.8)         | 10.3 (8.6-12.0) | <b>p &lt; 0.001</b>     |

**B**

| Target        | Total | Positive (%) | Baseline characteristics | Baseline characteristics + pupil size | DLS (external eye image) | Improvement      | P-value for improvement |
|---------------|-------|--------------|--------------------------|---------------------------------------|--------------------------|------------------|-------------------------|
| HbA1c > 9%†   | 4119  | 1457 (35.4%) | 66.5 (64.8-68.2)         | 66.8 (65.1-68.5)                      | 73.5 (71.9-75.1)         | 6.7 (5.1-8.3)    | <b>p &lt; 0.001</b>     |
| Tch ≥ 240     | 859   | 82 (9.5%)    | 57.3 (50.8-63.8)         | 57.3 (51.1-63.5)                      | 57.9 (51.1-64.7)         | 0.5 (-8.1-9.2)   | p = 0.451               |
| Tg ≥ 200      | 843   | 260 (30.8%)  | 59.2 (55.1-63.3)         | 59.2 (55.1-63.3)                      | 62.7 (58.7-66.7)         | 3.5 (-0.4-7.4)   | <b>p = 0.038</b>        |
| Moderate+ DR† | 4982  | 1174 (23.6%) | 77.3 (75.8-78.8)         | 78.1 (76.7-79.6)                      | 84.1 (82.8-85.3)         | 5.9 (4.2-7.6)    | <b>p &lt; 0.001</b>     |
| DME†          | 4982  | 397 (8.0%)   | 77.0 (74.7-79.3)         | 78.3 (76.1-80.4)                      | 84.7 (82.9-86.5)         | 6.4 (3.8-9.1)    | <b>p &lt; 0.001</b>     |
| VTDR†         | 4982  | 618 (12.4%)  | 77.0 (75.1-78.9)         | 78.2 (76.4-80.0)                      | 86.7 (85.3-88.2)         | 8.5 (6.5-10.6)   | <b>p &lt; 0.001</b>     |
| Cataract      | 5058  | 268 (5.3%)   | 74.1 (71.3-77.0)         | 75.2 (72.4-78.0)                      | 93.2 (91.5-94.8)         | 18.0 (15.1-20.8) | <b>p &lt; 0.001</b>     |

**C**

| Target        | Total | Positive (%) | Baseline characteristics | Baseline characteristics + pupil size | DLS (external eye image) | Improvement      | P-value for improvement |
|---------------|-------|--------------|--------------------------|---------------------------------------|--------------------------|------------------|-------------------------|
| HbA1c > 9%†   | 8995  | 1766 (19.6%) | 65.2 (63.8-66.6)         | 65.6 (64.2-67.0)                      | 69.3 (68.0-70.7)         | 3.7 (2.4-5.0)    | <b>p &lt; 0.001</b>     |
| Tch ≥ 240     | 9304  | 580 (6.2%)   | 62.7 (60.3-65.0)         | 62.6 (60.3-65.0)                      | 62.3 (60.0-64.7)         | -0.3 (-2.1-1.5)  | p = 0.630               |
| Tg ≥ 200      | 9280  | 2261 (24.4%) | 55.5 (54.2-56.9)         | 56.5 (55.2-57.9)                      | 66.3 (65.1-67.6)         | 9.8 (8.1-11.5)   | <b>p &lt; 0.001</b>     |
| Moderate+ DR† | 9513  | 457 (4.8%)   | 55.1 (52.4-57.7)         | 56.9 (54.3-59.5)                      | 77.0 (74.8-79.2)         | 20.1 (16.9-23.3) | <b>p &lt; 0.001</b>     |
| DME†          | 9525  | 135 (1.4%)   | 65.7 (61.1-70.2)         | 66.5 (62.0-71.0)                      | 77.7 (73.6-81.9)         | 11.2 (5.4-17.0)  | <b>p &lt; 0.001</b>     |
| VTDR†         | 9525  | 311 (3.3%)   | 57.7 (54.6-60.9)         | 61.1 (58.0-64.2)                      | 80.8 (78.4-83.3)         | 19.7 (16.0-23.5) | <b>p &lt; 0.001</b>     |

**D**

| Target      | Total | Positive (%) | Baseline characteristics | Baseline characteristics + pupil size | DLS (external eye image) | Improvement     | P-value for improvement |
|-------------|-------|--------------|--------------------------|---------------------------------------|--------------------------|-----------------|-------------------------|
| HbA1c > 9%† | 3200  | 357 (11.2%)  | 59.8 (56.7-62.8)         | 61.6 (58.6-64.6)                      | 67.6 (64.7-70.5)         | 6.0 (2.8-9.2)   | <b>p &lt; 0.001</b>     |
| Tch ≥ 240   | 4561  | 343 (7.5%)   | 60.5 (57.4-63.6)         | 60.6 (57.5-63.6)                      | 58.1 (55.0-61.3)         | -2.5 (-5.3-0.3) | p = 0.961               |
| Tg ≥ 200    | 4590  | 726 (15.8%)  | 56.3 (54.1-58.5)         | 56.2 (54.0-58.4)                      | 67.1 (64.9-69.2)         | 10.8 (8.1-13.6) | <b>p &lt; 0.001</b>     |



**Supplementary Table 3 | Adjusted analysis including pupil size for (A) validation set A, (B) validation set B, (C) validation set C, and (D) validation set D.**

Similar to Table 2. †:prespecified primary prediction tasks.

**A**

| Prediction target | Total | Positive (%) | Age (per decade)                           | Years with diabetes (per 5 years)          | Male                                       | White                                      | Black                                      | Asian / Pacific islander                   | Pupil radius relative to iris              | DLS (external eye image)                   |
|-------------------|-------|--------------|--------------------------------------------|--------------------------------------------|--------------------------------------------|--------------------------------------------|--------------------------------------------|--------------------------------------------|--------------------------------------------|--------------------------------------------|
| HbA1c > 7%        | 21183 | 13544 (63.9) | <b>0.890</b><br>(0.864-0.917)<br>p < 0.001 | <b>1.105</b><br>(1.041-1.174)<br>p = 0.001 | 0.962<br>(0.891-1.037)<br>p = 0.311        | 0.974<br>(0.889-1.067)<br>p = 0.567        | 1.077<br>(0.976-1.188)<br>p = 0.141        | <b>1.451</b><br>(1.407-1.496)<br>p < 0.001 | 0.994<br>(0.954-1.036)<br>p = 0.782        | <b>1.718</b><br>(1.657-1.781)<br>p < 0.001 |
| HbA1c > 8%        | 21183 | 9347 (44.1)  | <b>0.910</b><br>(0.882-0.939)<br>p < 0.001 | <b>1.068</b><br>(1.007-1.133)<br>p = 0.029 | <b>0.906</b><br>(0.841-0.975)<br>p = 0.009 | <b>0.914</b><br>(0.836-1.000)<br>p = 0.049 | 1.026<br>(0.930-1.132)<br>p = 0.607        | <b>1.325</b><br>(1.289-1.362)<br>p < 0.001 | 0.967<br>(0.929-1.006)<br>p = 0.099        | <b>1.944</b><br>(1.872-2.020)<br>p < 0.001 |
| HbA1c > 9%†       | 21183 | 6537 (30.9)  | <b>0.924</b><br>(0.894-0.956)<br>p < 0.001 | 1.065<br>(1.000-1.134)<br>p = 0.051        | <b>0.910</b><br>(0.841-0.984)<br>p = 0.018 | 0.949<br>(0.863-1.044)<br>p = 0.279        | 0.939<br>(0.843-1.046)<br>p = 0.252        | <b>1.209</b><br>(1.175-1.244)<br>p < 0.001 | <b>0.950</b><br>(0.910-0.991)<br>p = 0.019 | <b>1.957</b><br>(1.880-2.036)<br>p < 0.001 |
| Tch ≥ 200         | 9318  | 2913 (31.3)  | 0.964<br>(0.923-1.008)<br>p = 0.107        | 0.919<br>(0.838-1.008)<br>p = 0.073        | 0.964<br>(0.861-1.079)<br>p = 0.522        | <b>0.873</b><br>(0.775-0.983)<br>p = 0.025 | 0.839<br>(0.700-1.006)<br>p = 0.058        | <b>0.915</b><br>(0.878-0.953)<br>p < 0.001 | 0.984<br>(0.926-1.045)<br>p = 0.595        | <b>1.251</b><br>(1.187-1.318)<br>p < 0.001 |
| Tch ≥ 240         | 9318  | 984 (10.6)   | 0.975<br>(0.914-1.040)<br>p = 0.443        | 0.941<br>(0.822-1.076)<br>p = 0.374        | 1.067<br>(0.903-1.261)<br>p = 0.449        | 0.842<br>(0.702-1.011)<br>p = 0.065        | 0.829<br>(0.620-1.110)<br>p = 0.208        | <b>0.914</b><br>(0.858-0.973)<br>p = 0.005 | 0.944<br>(0.862-1.033)<br>p = 0.212        | <b>1.328</b><br>(1.241-1.420)<br>p < 0.001 |
| Tg ≥ 150          | 9104  | 4674 (51.3)  | 0.985<br>(0.947-1.024)<br>p = 0.434        | 1.045<br>(0.959-1.138)<br>p = 0.312        | 1.055<br>(0.945-1.178)<br>p = 0.342        | <b>0.802</b><br>(0.699-0.921)<br>p = 0.002 | <b>0.827</b><br>(0.703-0.972)<br>p = 0.021 | <b>0.911</b><br>(0.877-0.947)<br>p < 0.001 | 0.944<br>(0.891-1.001)<br>p = 0.056        | <b>1.514</b><br>(1.426-1.608)<br>p < 0.001 |
| Tg ≥ 200          | 9104  | 2894 (31.8)  | <b>0.935</b><br>(0.895-0.976)<br>p = 0.002 | <b>1.135</b><br>(1.035-1.244)<br>p = 0.007 | 1.026<br>(0.913-1.153)<br>p = 0.664        | <b>0.710</b><br>(0.613-0.821)<br>p < 0.001 | <b>0.795</b><br>(0.662-0.954)<br>p = 0.014 | <b>0.933</b><br>(0.894-0.973)<br>p = 0.001 | 0.947<br>(0.890-1.008)<br>p = 0.086        | <b>1.442</b><br>(1.357-1.533)<br>p < 0.001 |
| Tg ≥ 500          | 9104  | 323 (3.5)    | <b>0.851</b><br>(0.758-0.956)<br>p = 0.006 | <b>1.746</b><br>(1.362-2.239)<br>p < 0.001 | 1.121<br>(0.853-1.472)<br>p = 0.412        | <b>0.579</b><br>(0.401-0.835)<br>p = 0.003 | 0.750<br>(0.456-1.234)<br>p = 0.257        | 0.902<br>(0.809-1.006)<br>p = 0.064        | 0.898<br>(0.771-1.045)<br>p = 0.165        | <b>1.227</b><br>(1.100-1.370)<br>p < 0.001 |
| Mild+ DR          | 26950 | 5144 (19.1)  | <b>0.889</b><br>(0.863-0.916)<br>p < 0.001 | <b>1.141</b><br>(1.067-1.220)<br>p < 0.001 | <b>0.782</b><br>(0.719-0.850)<br>p < 0.001 | 1.007<br>(0.915-1.109)<br>p = 0.882        | <b>1.296</b><br>(1.159-1.448)<br>p < 0.001 | <b>1.635</b><br>(1.590-1.683)<br>p < 0.001 | <b>0.890</b><br>(0.852-0.931)<br>p < 0.001 | <b>1.789</b><br>(1.734-1.846)<br>p < 0.001 |
| Moderate+ DR†     | 26950 | 3247 (12.0)  | <b>0.887</b><br>(0.856-0.919)<br>p < 0.001 | <b>1.176</b><br>(1.084-1.275)<br>p < 0.001 | <b>0.785</b><br>(0.709-0.870)<br>p < 0.001 | <b>0.789</b><br>(0.699-0.889)<br>p < 0.001 | 1.131<br>(0.988-1.295)<br>p = 0.074        | <b>1.674</b><br>(1.619-1.730)<br>p < 0.001 | <b>0.843</b><br>(0.798-0.891)<br>p < 0.001 | <b>1.864</b><br>(1.803-1.927)<br>p < 0.001 |
| Severe+ DR        | 26950 | 404 (1.5)    | <b>0.851</b><br>(0.780-0.930)<br>p < 0.001 | <b>1.466</b><br>(1.192-1.804)<br>p < 0.001 | 0.804<br>(0.614-1.054)<br>p = 0.114        | 1.019<br>(0.746-1.392)<br>p = 0.905        | <b>2.192</b><br>(1.633-2.943)<br>p < 0.001 | <b>1.825</b><br>(1.680-1.983)<br>p < 0.001 | <b>0.809</b><br>(0.702-0.933)<br>p = 0.003 | <b>1.433</b><br>(1.373-1.495)<br>p < 0.001 |
| DME†              | 26950 | 797 (3.0)    | <b>0.882</b><br>(0.826-0.940)<br>p < 0.001 | <b>1.207</b><br>(1.041-1.399)<br>p = 0.013 | <b>0.635</b><br>(0.521-0.774)<br>p < 0.001 | 0.934<br>(0.761-1.147)<br>p = 0.516        | 1.195<br>(0.939-1.521)<br>p = 0.147        | <b>1.651</b><br>(1.556-1.751)<br>p < 0.001 | <b>0.830</b><br>(0.751-0.918)<br>p < 0.001 | <b>1.471</b><br>(1.413-1.532)<br>p < 0.001 |
| VTDR†             | 26950 | 1042 (3.9)   | <b>0.886</b><br>(0.836-0.938)<br>p < 0.001 | <b>1.214</b><br>(1.063-1.385)<br>p = 0.004 | <b>0.692</b><br>(0.581-0.823)<br>p < 0.001 | 0.988<br>(0.820-1.191)<br>p = 0.001        | <b>1.408</b><br>(1.143-1.734)<br>p < 0.001 | <b>1.719</b><br>(1.631-1.812)<br>p < 0.001 | <b>0.850</b><br>(0.777-0.931)<br>p < 0.001 | <b>1.563</b><br>(1.506-1.622)<br>p < 0.001 |

|          |       |           |                                                             |                                                          |                                                             |                                                          |                                                             |                                     |                                     |                                                             |
|----------|-------|-----------|-------------------------------------------------------------|----------------------------------------------------------|-------------------------------------------------------------|----------------------------------------------------------|-------------------------------------------------------------|-------------------------------------|-------------------------------------|-------------------------------------------------------------|
|          |       |           | <b>p &lt; 0.001</b>                                         |                                                          | <b>p &lt; 0.001</b>                                         | p = 0.898                                                | <b>p = 0.001</b>                                            |                                     |                                     |                                                             |
| Cataract | 27415 | 639 (2.3) | <b>1.683</b><br><b>(1.547-1.831)</b><br><b>p &lt; 0.001</b> | <b>0.828</b><br><b>(0.694-0.988)</b><br><b>p = 0.036</b> | <b>1.617</b><br><b>(1.272-2.054)</b><br><b>p &lt; 0.001</b> | <b>1.351</b><br><b>(1.015-1.800)</b><br><b>p = 0.039</b> | <b>3.753</b><br><b>(2.954-4.768)</b><br><b>p &lt; 0.001</b> | 1.073<br>(0.999-1.151)<br>p = 0.052 | 0.889<br>(0.786-1.004)<br>p = 0.058 | <b>1.617</b><br><b>(1.555-1.681)</b><br><b>p &lt; 0.001</b> |

**B**

| Prediction target | Total | Positive (%) | Age (per decade)                                            | Years with diabetes (per 5 years)                           | Male                                                     | White                                                    | Black                                                    | Asian / Pacific islander                                    | Pupil radius relative to iris                               | DLS (external eye image)                                    |
|-------------------|-------|--------------|-------------------------------------------------------------|-------------------------------------------------------------|----------------------------------------------------------|----------------------------------------------------------|----------------------------------------------------------|-------------------------------------------------------------|-------------------------------------------------------------|-------------------------------------------------------------|
| HbA1c > 7%        | 4120  | 2819 (68.4)  | <b>0.864</b><br><b>(0.799-0.933)</b><br><b>p &lt; 0.001</b> | 1.159<br>(0.995-1.350)<br>p = 0.058                         | 0.809<br>(0.604-1.083)<br>p = 0.154                      | 0.827<br>(0.633-1.081)<br>p = 0.165                      | 1.519<br>(0.810-2.848)<br>p = 0.192                      | <b>1.416</b><br><b>(1.317-1.523)</b><br><b>p &lt; 0.001</b> | 0.987<br>(0.897-1.087)<br>p = 0.795                         | <b>2.240</b><br><b>(2.048-2.451)</b><br><b>p &lt; 0.001</b> |
| HbA1c > 8%        | 4120  | 1991 (48.3)  | <b>0.913</b><br><b>(0.846-0.985)</b><br><b>p = 0.018</b>    | <b>1.208</b><br><b>(1.049-1.391)</b><br><b>p = 0.009</b>    | 0.847<br>(0.637-1.127)<br>p = 0.254                      | <b>0.697</b><br><b>(0.542-0.896)</b><br><b>p = 0.005</b> | 1.492<br>(0.821-2.709)<br>p = 0.189                      | <b>1.317</b><br><b>(1.236-1.402)</b><br><b>p &lt; 0.001</b> | 1.022<br>(0.934-1.119)<br>p = 0.632                         | <b>2.302</b><br><b>(2.106-2.516)</b><br><b>p &lt; 0.001</b> |
| HbA1c > 9%†       | 4120  | 1455 (35.3)  | 0.948<br>(0.875-1.027)<br>p = 0.188                         | <b>1.177</b><br><b>(1.018-1.360)</b><br><b>p = 0.028</b>    | 0.837<br>(0.617-1.135)<br>p = 0.252                      | 0.792<br>(0.610-1.027)<br>p = 0.078                      | 1.422<br>(0.756-2.676)<br>p = 0.275                      | <b>1.198</b><br><b>(1.125-1.275)</b><br><b>p &lt; 0.001</b> | 1.012<br>(0.922-1.112)<br>p = 0.796                         | <b>2.247</b><br><b>(2.053-2.459)</b><br><b>p &lt; 0.001</b> |
| Tch ≥ 200         | 859   | 219 (25.5)   | 1.080<br>(0.923-1.264)<br>p = 0.337                         | 0.868<br>(0.626-1.205)<br>p = 0.399                         | <b>1.923</b><br><b>(1.170-3.160)</b><br><b>p = 0.010</b> | 1.372<br>(0.927-2.030)<br>p = 0.114                      | <b>3.092</b><br><b>(1.202-7.952)</b><br><b>p = 0.019</b> | 0.920<br>(0.806-1.051)<br>p = 0.221                         | 1.014<br>(0.853-1.207)<br>p = 0.872                         | <b>1.419</b><br><b>(1.179-1.708)</b><br><b>p &lt; 0.001</b> |
| Tch ≥ 240         | 859   | 82 (9.5)     | 1.078<br>(0.859-1.353)<br>p = 0.517                         | 0.791<br>(0.492-1.271)<br>p = 0.333                         | 1.719<br>(0.855-3.455)<br>p = 0.128                      | 1.326<br>(0.751-2.342)<br>p = 0.331                      | 0.685<br>(0.087-5.396)<br>p = 0.719                      | 0.822<br>(0.671-1.008)<br>p = 0.059                         | 1.018<br>(0.787-1.317)<br>p = 0.892                         | <b>1.316</b><br><b>(1.032-1.680)</b><br><b>p = 0.027</b>    |
| Tg ≥ 150          | 843   | 414 (49.1)   | 1.136<br>(0.995-1.296)<br>p = 0.059                         | 1.119<br>(0.843-1.485)<br>p = 0.437                         | 1.162<br>(0.718-1.880)<br>p = 0.540                      | 0.833<br>(0.538-1.292)<br>p = 0.415                      | 0.726<br>(0.296-1.778)<br>p = 0.483                      | <b>0.884</b><br><b>(0.786-0.994)</b><br><b>p = 0.040</b>    | 1.052<br>(0.903-1.226)<br>p = 0.515                         | <b>1.459</b><br><b>(1.208-1.762)</b><br><b>p &lt; 0.001</b> |
| Tg ≥ 200          | 843   | 260 (30.8)   | 1.063<br>(0.916-1.233)<br>p = 0.422                         | 1.141<br>(0.837-1.555)<br>p = 0.403                         | 1.273<br>(0.779-2.080)<br>p = 0.335                      | 0.618<br>(0.381-1.002)<br>p = 0.051                      | 0.694<br>(0.245-1.971)<br>p = 0.493                      | 0.921<br>(0.810-1.046)<br>p = 0.204                         | 0.962<br>(0.816-1.135)<br>p = 0.646                         | <b>1.404</b><br><b>(1.156-1.705)</b><br><b>p &lt; 0.001</b> |
| Tg ≥ 500          | 843   | 21 (2.5)*    | 0.724<br>(0.447-1.174)<br>p = 0.190                         | 2.261<br>(0.838-6.104)<br>p = 0.107                         | 2.884<br>(0.840-9.899)<br>p = 0.092                      | 0.451<br>(0.095-2.132)<br>p = 0.315                      | 1.652<br>(0.187-14.554)<br>p = 0.651                     | 0.787<br>(0.525-1.179)<br>p = 0.245                         | 0.735<br>(0.469-1.151)<br>p = 0.179                         | 0.897<br>(0.527-1.527)<br>p = 0.688                         |
| Mild+ DR          | 4982  | 1509 (30.3)  | <b>0.927</b><br><b>(0.863-0.996)</b><br><b>p = 0.038</b>    | <b>1.340</b><br><b>(1.153-1.558)</b><br><b>p &lt; 0.001</b> | 0.770<br>(0.579-1.025)<br>p = 0.073                      | <b>0.736</b><br><b>(0.564-0.960)</b><br><b>p = 0.024</b> | <b>1.853</b><br><b>(1.003-3.423)</b><br><b>p = 0.049</b> | <b>1.700</b><br><b>(1.595-1.812)</b><br><b>p &lt; 0.001</b> | 0.919<br>(0.838-1.008)<br>p = 0.075                         | <b>2.875</b><br><b>(2.646-3.124)</b><br><b>p &lt; 0.001</b> |
| Moderate+ DR†     | 4982  | 1172 (23.5)  | <b>0.881</b><br><b>(0.813-0.954)</b><br><b>p = 0.002</b>    | <b>1.399</b><br><b>(1.184-1.655)</b><br><b>p &lt; 0.001</b> | <b>0.629</b><br><b>(0.449-0.880)</b><br><b>p = 0.007</b> | <b>0.667</b><br><b>(0.497-0.896)</b><br><b>p = 0.007</b> | 1.559<br>(0.791-3.074)<br>p = 0.200                      | <b>1.749</b><br><b>(1.632-1.874)</b><br><b>p &lt; 0.001</b> | <b>0.820</b><br><b>(0.741-0.908)</b><br><b>p &lt; 0.001</b> | <b>3.047</b><br><b>(2.793-3.324)</b><br><b>p &lt; 0.001</b> |
| Severe+ DR        | 4982  | 455 (9.1)    | <b>0.833</b><br><b>(0.743-0.934)</b><br><b>p = 0.002</b>    | <b>1.378</b><br><b>(1.091-1.740)</b><br><b>p = 0.007</b>    | 0.466<br>(0.264-0.820)<br>p = 0.008                      | 0.492<br>(0.295-0.819)<br>p = 0.006                      | 0.178<br>(0.025-1.246)<br>p = 0.082                      | <b>1.606</b><br><b>(1.462-1.765)</b><br><b>p &lt; 0.001</b> | <b>0.842</b><br><b>(0.731-0.970)</b><br><b>p = 0.017</b>    | <b>2.457</b><br><b>(2.241-2.695)</b><br><b>p &lt; 0.001</b> |
| DME†              | 4982  | 394 (7.9)    | 1.011<br>(0.899-1.136)<br>p = 0.857                         | <b>1.558</b><br><b>(1.231-1.972)</b><br><b>p &lt; 0.001</b> | 0.303<br>(0.161-0.573)<br>p < 0.001                      | 0.464<br>(0.288-0.748)<br>p = 0.002                      | 0.641<br>(0.197-2.090)<br>p = 0.461                      | <b>1.702</b><br><b>(1.549-1.870)</b><br><b>p &lt; 0.001</b> | <b>0.766</b><br><b>(0.667-0.879)</b><br><b>p &lt; 0.001</b> | <b>1.932</b><br><b>(1.778-2.100)</b><br><b>p &lt; 0.001</b> |
| VTDR†             | 4982  | 617 (12.4)   | <b>0.895</b><br><b>(0.809-0.990)</b><br><b>p = 0.032</b>    | <b>1.465</b><br><b>(1.191-1.804)</b><br><b>p &lt; 0.001</b> | 0.413<br>(0.253-0.676)<br>p < 0.001                      | 0.501<br>(0.334-0.752)<br>p < 0.001                      | 0.585<br>(0.187-1.833)<br>p = 0.358                      | <b>1.695</b><br><b>(1.560-1.842)</b><br><b>p &lt; 0.001</b> | <b>0.777</b><br><b>(0.686-0.880)</b><br><b>p &lt; 0.001</b> | <b>2.523</b><br><b>(2.311-2.754)</b><br><b>p &lt; 0.001</b> |

|          |      |           |                                                             |                                     |                                     |                                     |                                                          |                                                          |                                                             |                                                             |
|----------|------|-----------|-------------------------------------------------------------|-------------------------------------|-------------------------------------|-------------------------------------|----------------------------------------------------------|----------------------------------------------------------|-------------------------------------------------------------|-------------------------------------------------------------|
| Cataract | 5058 | 268 (5.3) | <b>1.406</b><br><b>(1.206-1.639)</b><br><b>p &lt; 0.001</b> | 1.224<br>(0.888-1.688)<br>p = 0.216 | 1.267<br>(0.727-2.208)<br>p = 0.403 | 0.545<br>(0.293-1.013)<br>p = 0.055 | <b>3.095</b><br><b>(1.378-6.951)</b><br><b>p = 0.006</b> | <b>1.210</b><br><b>(1.072-1.366)</b><br><b>p = 0.002</b> | <b>0.657</b><br><b>(0.549-0.785)</b><br><b>p &lt; 0.001</b> | <b>2.699</b><br><b>(2.453-2.970)</b><br><b>p &lt; 0.001</b> |
|----------|------|-----------|-------------------------------------------------------------|-------------------------------------|-------------------------------------|-------------------------------------|----------------------------------------------------------|----------------------------------------------------------|-------------------------------------------------------------|-------------------------------------------------------------|

**\*Note: fewer than 50 positive examples.**

## C

| Prediction target | Total | Positive (%) | Age (per decade)                                            | Male                                                        | Pupil radius relative to iris                               | DLS (external eye image)                                    |
|-------------------|-------|--------------|-------------------------------------------------------------|-------------------------------------------------------------|-------------------------------------------------------------|-------------------------------------------------------------|
| HbA1c > 7%        | 8995  | 5119 (56.9)  | <b>0.889</b><br><b>(0.847-0.933)</b><br><b>p &lt; 0.001</b> | 1.175<br>(0.953-1.449)<br>p = 0.130                         | 1.050<br>(0.997-1.106)<br>p = 0.065                         | <b>1.638</b><br><b>(1.558-1.722)</b><br><b>p &lt; 0.001</b> |
| HbA1c > 8%        | 8995  | 2947 (32.8)  | <b>0.834</b><br><b>(0.790-0.880)</b><br><b>p &lt; 0.001</b> | 1.176<br>(0.946-1.462)<br>p = 0.145                         | 1.032<br>(0.976-1.092)<br>p = 0.265                         | <b>1.720</b><br><b>(1.627-1.817)</b><br><b>p &lt; 0.001</b> |
| HbA1c > 9%†       | 8995  | 1766 (19.6)  | <b>0.810</b><br><b>(0.758-0.865)</b><br><b>p &lt; 0.001</b> | 1.002<br>(0.787-1.277)<br>p = 0.985                         | 1.016<br>(0.950-1.086)<br>p = 0.644                         | <b>1.778</b><br><b>(1.668-1.895)</b><br><b>p &lt; 0.001</b> |
| Tch ≥ 200         | 9304  | 1935 (20.8)  | <b>0.806</b><br><b>(0.755-0.860)</b><br><b>p &lt; 0.001</b> | <b>0.801</b><br><b>(0.645-0.996)</b><br><b>p = 0.046</b>    | 1.011<br>(0.953-1.073)<br>p = 0.717                         | <b>1.254</b><br><b>(1.173-1.340)</b><br><b>p &lt; 0.001</b> |
| Tch ≥ 240         | 9304  | 580 (6.2)    | <b>0.768</b><br><b>(0.694-0.851)</b><br><b>p &lt; 0.001</b> | 0.812<br>(0.584-1.129)<br>p = 0.216                         | 1.011<br>(0.916-1.116)<br>p = 0.827                         | <b>1.272</b><br><b>(1.153-1.403)</b><br><b>p &lt; 0.001</b> |
| Tg ≥ 150          | 9280  | 3825 (41.2)  | <b>0.945</b><br><b>(0.905-0.988)</b><br><b>p = 0.013</b>    | <b>1.531</b><br><b>(1.226-1.912)</b><br><b>p &lt; 0.001</b> | 1.037<br>(0.986-1.091)<br>p = 0.162                         | <b>1.735</b><br><b>(1.658-1.816)</b><br><b>p &lt; 0.001</b> |
| Tg ≥ 200          | 9280  | 2261 (24.4)  | <b>0.913</b><br><b>(0.867-0.961)</b><br><b>p &lt; 0.001</b> | <b>1.943</b><br><b>(1.459-2.587)</b><br><b>p &lt; 0.001</b> | 1.055<br>(0.995-1.118)<br>p = 0.074                         | <b>1.747</b><br><b>(1.662-1.838)</b><br><b>p &lt; 0.001</b> |
| Tg ≥ 500          | 9280  | 205 (2.2)    | <b>0.793</b><br><b>(0.680-0.925)</b><br><b>p = 0.003</b>    | 1.368<br>(0.630-2.973)<br>p = 0.429                         | 1.072<br>(0.907-1.268)<br>p = 0.415                         | <b>1.572</b><br><b>(1.412-1.750)</b><br><b>p &lt; 0.001</b> |
| Mild+ DR          | 9518  | 992 (10.4)   | 0.941<br>(0.878-1.010)<br>p = 0.090                         | <b>1.607</b><br><b>(1.075-2.404)</b><br><b>p = 0.021</b>    | 0.934<br>(0.862-1.012)<br>p = 0.095                         | <b>1.991</b><br><b>(1.883-2.105)</b><br><b>p &lt; 0.001</b> |
| Moderate+ DR†     | 9518  | 454 (4.8)    | <b>0.829</b><br><b>(0.749-0.916)</b><br><b>p &lt; 0.001</b> | 1.815<br>(0.992-3.322)<br>p = 0.053                         | <b>0.857</b><br><b>(0.764-0.960)</b><br><b>p = 0.008</b>    | <b>2.022</b><br><b>(1.891-2.162)</b><br><b>p &lt; 0.001</b> |
| Severe+ DR        | 9518  | 203 (2.1)    | <b>0.777</b><br><b>(0.674-0.896)</b><br><b>p &lt; 0.001</b> | 2.670<br>(0.973-7.327)<br>p = 0.057                         | <b>0.728</b><br><b>(0.620-0.855)</b><br><b>p &lt; 0.001</b> | <b>1.592</b><br><b>(1.480-1.714)</b><br><b>p &lt; 0.001</b> |
| DME†              | 9528  | 119 (1.2)    | <b>0.579</b><br><b>(0.482-0.696)</b><br><b>p &lt; 0.001</b> | 2.217<br>(0.761-6.463)<br>p = 0.145                         | <b>0.744</b><br><b>(0.601-0.920)</b><br><b>p = 0.006</b>    | <b>1.717</b><br><b>(1.556-1.894)</b><br><b>p &lt; 0.001</b> |
| VTDR†             | 9528  | 287 (3.0)    | <b>0.712</b><br><b>(0.628-0.807)</b><br><b>p &lt; 0.001</b> | 2.143<br>(0.992-4.632)<br>p = 0.053                         | <b>0.768</b><br><b>(0.667-0.884)</b><br><b>p &lt; 0.001</b> | <b>1.920</b><br><b>(1.787-2.063)</b><br><b>p &lt; 0.001</b> |

**D**

| Prediction target | Total | Positive (%) | Age (per decade)                                     | BMI (per 5 kg/m <sup>2</sup> )                       | Male                                                 | White                                                | Other                                             | Pupil radius relative to iris                        | DLS (external eye image)                             |
|-------------------|-------|--------------|------------------------------------------------------|------------------------------------------------------|------------------------------------------------------|------------------------------------------------------|---------------------------------------------------|------------------------------------------------------|------------------------------------------------------|
| HbA1c > 7%        | 2949  | 1045 (35.4)  | <b>1.233</b><br>(1.139-1.336)<br><b>p &lt; 0.001</b> | <b>1.343</b><br>(1.256-1.436)<br><b>p &lt; 0.001</b> | <b>2.592</b><br>(1.933-3.476)<br><b>p &lt; 0.001</b> | 0.856<br>(0.716-1.023)<br>p = 0.088                  | 0.797<br>(0.551-1.151)<br>p = 0.226               | <b>0.764</b><br>(0.691-0.845)<br><b>p &lt; 0.001</b> | <b>1.759</b><br>(1.612-1.920)<br><b>p &lt; 0.001</b> |
| HbA1c > 8%        | 2949  | 572 (19.4)   | <b>1.262</b><br>(1.142-1.395)<br><b>p &lt; 0.001</b> | <b>1.215</b><br>(1.126-1.310)<br><b>p &lt; 0.001</b> | <b>1.651</b><br>(1.181-2.308)<br><b>p = 0.003</b>    | <b>0.665</b><br>(0.535-0.826)<br><b>p &lt; 0.001</b> | <b>0.617</b><br>(0.387-0.984)<br><b>p = 0.043</b> | <b>0.815</b><br>(0.723-0.919)<br><b>p &lt; 0.001</b> | <b>1.946</b><br>(1.752-2.162)<br><b>p &lt; 0.001</b> |
| HbA1c > 9%†       | 2949  | 331 (11.2)   | 1.127<br>(0.994-1.278)<br>p = 0.063                  | <b>1.146</b><br>(1.046-1.256)<br><b>p = 0.003</b>    | 1.443<br>(0.990-2.104)<br>p = 0.056                  | <b>0.414</b><br>(0.311-0.551)<br><b>p &lt; 0.001</b> | <b>0.319</b><br>(0.158-0.648)<br><b>p = 0.002</b> | <b>0.739</b><br>(0.638-0.856)<br><b>p &lt; 0.001</b> | <b>1.832</b><br>(1.619-2.073)<br><b>p &lt; 0.001</b> |
| Tch ≥ 200         | 3866  | 1029 (26.6)  | 0.953<br>(0.881-1.030)<br>p = 0.226                  | <b>0.880</b><br>(0.827-0.936)<br><b>p &lt; 0.001</b> | <b>0.628</b><br>(0.512-0.769)<br><b>p &lt; 0.001</b> | 1.016<br>(0.865-1.194)<br>p = 0.845                  | 1.046<br>(0.758-1.443)<br>p = 0.785               | 1.070<br>(0.979-1.169)<br>p = 0.137                  | <b>1.298</b><br>(1.185-1.421)<br><b>p &lt; 0.001</b> |
| Tch ≥ 240         | 3866  | 301 (7.8)    | 0.940<br>(0.834-1.060)<br>p = 0.315                  | <b>0.803</b><br>(0.723-0.893)<br><b>p &lt; 0.001</b> | <b>0.577</b><br>(0.425-0.782)<br><b>p &lt; 0.001</b> | 1.177<br>(0.905-1.532)<br>p = 0.225                  | 1.404<br>(0.864-2.281)<br>p = 0.171               | 0.969<br>(0.840-1.119)<br>p = 0.672                  | <b>1.223</b><br>(1.072-1.396)<br><b>p = 0.003</b>    |
| Tg ≥ 150          | 3891  | 1102 (28.3)  | 0.974<br>(0.905-1.048)<br>p = 0.485                  | <b>1.144</b><br>(1.077-1.216)<br><b>p &lt; 0.001</b> | <b>1.815</b><br>(1.405-2.345)<br><b>p &lt; 0.001</b> | <b>1.443</b><br>(1.145-1.820)<br><b>p = 0.002</b>    | 1.170<br>(0.832-1.646)<br>p = 0.367               | <b>0.831</b><br>(0.759-0.909)<br><b>p &lt; 0.001</b> | <b>1.512</b><br>(1.356-1.687)<br><b>p &lt; 0.001</b> |
| Tg ≥ 200          | 3891  | 612 (15.7)   | 0.966<br>(0.883-1.057)<br>p = 0.455                  | <b>1.160</b><br>(1.079-1.247)<br><b>p &lt; 0.001</b> | <b>1.543</b><br>(1.119-2.128)<br><b>p = 0.008</b>    | <b>1.386</b><br>(1.050-1.830)<br><b>p = 0.021</b>    | <b>1.618</b><br>(1.096-2.387)<br><b>p = 0.015</b> | 0.927<br>(0.830-1.035)<br>p = 0.177                  | <b>1.537</b><br>(1.362-1.734)<br><b>p &lt; 0.001</b> |
| Tg ≥ 500          | 3891  | 43 (1.1)*    | <b>0.715</b><br>(0.536-0.953)<br><b>p = 0.022</b>    | 0.959<br>(0.751-1.224)<br>p = 0.736                  | <b>5.696</b><br>(1.013-32.028)<br><b>p = 0.048</b>   | 1.611<br>(0.752-3.454)<br>p = 0.220                  | 1.036<br>(0.251-4.277)<br>p = 0.961               | 0.820<br>(0.576-1.168)<br>p = 0.271                  | 1.200<br>(0.938-1.536)<br>p = 0.147                  |

\*Note: fewer than 50 positive examples.

**Supplementary Table 4 | Adjusted analysis for diabetic eye disease targets including HbA1c.**

†:prespecified primary prediction tasks.

**A**

| Prediction target | Total | Positive (%) | Age (per decade)                 | Years with diabetes (per 5 years) | Male                             | White                            | Black                            | Asian / Pacific islander         | HbA1c (per 5%)                   | DLS (external eye image)         |
|-------------------|-------|--------------|----------------------------------|-----------------------------------|----------------------------------|----------------------------------|----------------------------------|----------------------------------|----------------------------------|----------------------------------|
| Mild+ DR          | 21142 | 4075 (19.3)  | 0.954 (0.922-0.987)<br>p = 0.007 | 1.144 (1.061-1.233)<br>p < 0.001  | 0.784 (0.711-0.864)<br>p < 0.001 | 1.168 (1.049-1.301)<br>p = 0.005 | 1.230 (1.090-1.389)<br>p < 0.001 | 1.594 (1.543-1.647)<br>p < 0.001 | 2.077 (1.914-2.254)<br>p < 0.001 | 1.695 (1.636-1.757)<br>p < 0.001 |
| Moderate+ DR†     | 21142 | 2535 (12.0)  | 1.001 (0.961-1.043)<br>p = 0.958 | 1.155 (1.054-1.267)<br>p = 0.002  | 0.779 (0.691-0.878)<br>p < 0.001 | 0.922 (0.806-1.055)<br>p = 0.239 | 1.175 (1.015-1.360)<br>p = 0.030 | 1.616 (1.555-1.680)<br>p < 0.001 | 2.509 (2.275-2.767)<br>p < 0.001 | 1.764 (1.698-1.832)<br>p < 0.001 |
| Severe+ DR        | 21142 | 335 (1.6)    | 0.996 (0.902-1.101)<br>p = 0.944 | 1.373 (1.094-1.725)<br>p = 0.006  | 0.838 (0.616-1.142)<br>p = 0.263 | 1.100 (0.776-1.560)<br>p = 0.592 | 2.136 (1.552-2.941)<br>p < 0.001 | 1.818 (1.658-1.993)<br>p < 0.001 | 2.343 (1.844-2.978)<br>p < 0.001 | 1.460 (1.392-1.533)<br>p < 0.001 |
| DME†              | 21142 | 618 (2.9)    | 1.036 (0.961-1.117)<br>p = 0.355 | 1.267 (1.071-1.499)<br>p = 0.006  | 0.649 (0.515-0.817)<br>p < 0.001 | 1.010 (0.800-1.274)<br>p = 0.934 | 1.131 (0.868-1.473)<br>p = 0.363 | 1.565 (1.462-1.675)<br>p < 0.001 | 2.662 (2.241-3.163)<br>p < 0.001 | 1.409 (1.348-1.473)<br>p < 0.001 |
| VTDR†             | 21142 | 825 (3.9)    | 1.042 (0.975-1.114)<br>p = 0.227 | 1.233 (1.062-1.431)<br>p = 0.006  | 0.714 (0.583-0.874)<br>p = 0.001 | 1.052 (0.850-1.301)<br>p = 0.641 | 1.391 (1.109-1.746)<br>p = 0.004 | 1.664 (1.566-1.768)<br>p < 0.001 | 2.571 (2.199-3.005)<br>p < 0.001 | 1.550 (1.487-1.617)<br>p < 0.001 |
| Cataract          | 21478 | 537 (2.5)    | 1.745 (1.587-1.918)<br>p < 0.001 | 0.855 (0.704-1.038)<br>p = 0.113  | 1.459 (1.120-1.900)<br>p = 0.005 | 1.335 (0.979-1.820)<br>p = 0.068 | 2.807 (2.158-3.652)<br>p < 0.001 | 1.124 (1.039-1.216)<br>p = 0.004 | 1.389 (1.105-1.746)<br>p = 0.005 | 1.667 (1.594-1.743)<br>p < 0.001 |

**B**

| Prediction target | Total | Positive (%) | Age (per decade)                 | Years with diabetes (per 5 years) | Male                             | White                            | Black                            | Asian / Pacific islander         | HbA1c (per 5%)                   | DLS (external eye image)         |
|-------------------|-------|--------------|----------------------------------|-----------------------------------|----------------------------------|----------------------------------|----------------------------------|----------------------------------|----------------------------------|----------------------------------|
| Mild+ DR          | 4094  | 1217 (29.7)  | 0.999 (0.920-1.085)<br>p = 0.980 | 1.396 (1.176-1.657)<br>p < 0.001  | 0.890 (0.626-1.264)<br>p = 0.515 | 0.676 (0.501-0.914)<br>p = 0.011 | 1.942 (0.999-3.773)<br>p = 0.050 | 1.669 (1.551-1.796)<br>p < 0.001 | 2.265 (1.866-2.749)<br>p < 0.001 | 2.884 (2.622-3.172)<br>p < 0.001 |
| Moderate+ DR†     | 4094  | 960 (23.4)   | 0.966 (0.881-1.059)<br>p = 0.461 | 1.490 (1.231-1.803)<br>p < 0.001  | 0.813 (0.540-1.223)<br>p = 0.321 | 0.659 (0.472-0.919)<br>p = 0.014 | 1.989 (0.968-4.083)<br>p = 0.061 | 1.663 (1.536-1.800)<br>p < 0.001 | 2.549 (2.062-3.152)<br>p < 0.001 | 3.205 (2.897-3.545)<br>p < 0.001 |
| Severe+ DR        | 4094  | 401 (9.8)    | 0.968 (0.856-1.096)<br>p = 0.610 | 1.473 (1.149-1.888)<br>p = 0.002  | 0.643 (0.346-1.193)<br>p = 0.161 | 0.877 (0.557-1.379)<br>p = 0.569 | 0.597 (0.136-2.628)<br>p = 0.496 | 1.568 (1.417-1.734)<br>p < 0.001 | 1.811 (1.384-2.370)<br>p < 0.001 | 2.391 (2.162-2.646)<br>p < 0.001 |
| DME†              | 4094  | 321 (7.8)    | 1.127 (0.986-1.288)<br>p = 0.080 | 1.482 (1.141-1.924)<br>p = 0.003  | 0.516 (0.255-1.044)<br>p = 0.066 | 0.563 (0.338-0.940)<br>p = 0.028 | 1.584 (0.584-4.299)<br>p = 0.367 | 1.533 (1.380-1.703)<br>p < 0.001 | 2.311 (1.749-3.055)<br>p < 0.001 | 1.992 (1.812-2.190)<br>p < 0.001 |
| VTDR†             | 4094  | 514 (12.6)   | 1.023 (0.914-1.146)<br>p = 0.689 | 1.463 (1.164-1.840)<br>p = 0.001  | 0.660 (0.385-1.132)<br>p = 0.131 | 0.632 (0.415-0.963)<br>p = 0.033 | 1.056 (0.376-2.968)<br>p = 0.918 | 1.618 (1.474-1.775)<br>p < 0.001 | 2.222 (1.733-2.849)<br>p < 0.001 | 2.549 (2.309-2.814)<br>p < 0.001 |
| Cataract          | 4169  | 218 (5.2)    | 1.520 (1.272-1.816)<br>p < 0.001 | 1.320 (0.922-1.892)<br>p = 0.130  | 0.913 (0.422-1.972)<br>p = 0.816 | 0.859 (0.434-1.701)<br>p = 0.663 | 3.115 (1.249-7.772)<br>p = 0.015 | 1.200 (1.046-1.375)<br>p = 0.009 | 1.540 (1.037-2.287)<br>p = 0.032 | 2.748 (2.464-3.066)<br>p < 0.001 |

## C

| Prediction target | Total | Positive (%) | Age (per decade)                                  | Male                                 | HbA1c (per 5%)                                    | DLS (external eye image)                          |
|-------------------|-------|--------------|---------------------------------------------------|--------------------------------------|---------------------------------------------------|---------------------------------------------------|
| Mild+ DR          | 8454  | 908 (10.7)   | 1.051<br>(0.973-1.137)<br>p = 0.206               | 1.308<br>(0.882-1.941)<br>p = 0.182  | <b>2.686</b><br><b>(2.252-3.205)</b><br>p < 0.001 | <b>1.940</b><br><b>(1.828-2.060)</b><br>p < 0.001 |
| Moderate+ DR†     | 8454  | 414 (4.9)    | 0.973<br>(0.870-1.087)<br>p = 0.628               | 1.440<br>(0.801-2.590)<br>p = 0.223  | <b>2.848</b><br><b>(2.244-3.614)</b><br>p < 0.001 | <b>1.937</b><br><b>(1.805-2.079)</b><br>p < 0.001 |
| Severe+ DR        | 8454  | 195 (2.3)    | 0.862<br>(0.740-1.003)<br>p = 0.055               | 1.662<br>(0.716-3.860)<br>p = 0.237  | <b>2.375</b><br><b>(1.704-3.311)</b><br>p < 0.001 | <b>1.613</b><br><b>(1.498-1.736)</b><br>p < 0.001 |
| DME†              | 8471  | 131 (1.5)    | <b>0.694</b><br><b>(0.578-0.833)</b><br>p < 0.001 | 3.182<br>(0.964-10.501)<br>p = 0.057 | <b>4.025</b><br><b>(2.813-5.759)</b><br>p < 0.001 | <b>1.599</b><br><b>(1.465-1.746)</b><br>p < 0.001 |
| VTDR†             | 8471  | 291 (3.4)    | <b>0.812</b><br><b>(0.713-0.924)</b><br>p = 0.002 | 1.847<br>(0.902-3.783)<br>p = 0.093  | <b>2.775</b><br><b>(2.116-3.638)</b><br>p < 0.001 | <b>1.778</b><br><b>(1.658-1.907)</b><br>p < 0.001 |



**Supplementary Table 5 | Subgroup analysis for HbA1c  $\geq$  9% in validation set A.**

Note that the sum of some subgroups can exceed the total because some patients have multiple visits over time that can fall under different groups. None of the subgroups' DLS AUC decreased by >5% compared to the entire cohort.

| Category                | Subgroup                 | No. of visits |              | AUC (%) (95% CI)         |                          |                 |                         |
|-------------------------|--------------------------|---------------|--------------|--------------------------|--------------------------|-----------------|-------------------------|
|                         |                          | Total         | Positive (%) | Baseline characteristics | DLS (external eye image) | Improvement     | P-value for improvement |
| All                     |                          | 21183         | 6537 (30.9%) | 64.8 (64.0-65.6)         | 70.0 (69.3-70.8)         | 5.2 (4.5-6.0)   | p < 0.001               |
| Age                     | ≤50 years old            | 8081          | 3198 (39.6%) | 61.0 (59.7-62.3)         | 67.9 (66.8-69.1)         | 6.9 (5.6-8.3)   | p < 0.001               |
|                         | 50-60 years old          | 6989          | 2126 (30.4%) | 60.8 (59.4-62.2)         | 66.7 (65.3-68.1)         | 5.9 (4.3-7.6)   | p < 0.001               |
|                         | >60 years old            | 6542          | 1339 (20.5%) | 61.8 (60.1-63.5)         | 67.3 (65.7-68.9)         | 5.5 (3.6-7.4)   | p < 0.001               |
| Sex                     | Male                     | 10019         | 3344 (33.4%) | 64.1 (63.0-65.2)         | 69.4 (68.3-70.4)         | 5.3 (4.2-6.4)   | p < 0.001               |
|                         | Female                   | 11154         | 3241 (29.1%) | 65.1 (64.0-66.2)         | 70.2 (69.1-71.2)         | 5.1 (4.0-6.2)   | p < 0.001               |
| Race / ethnicity        | Hispanic                 | 8687          | 3107 (35.8%) | 63.6 (62.4-64.8)         | 70.1 (69.0-71.3)         | 6.5 (5.3-7.7)   | p < 0.001               |
|                         | White                    | 5559          | 1579 (28.4%) | 63.0 (61.4-64.6)         | 66.1 (64.5-67.7)         | 3.1 (1.6-4.6)   | p < 0.001               |
|                         | Black                    | 3147          | 914 (29.0%)  | 65.5 (63.4-67.6)         | 65.7 (63.6-67.8)         | 0.2 (-2.0-2.4)  | p = 0.428               |
|                         | Asian / Pacific islander | 2615          | 627 (24.0%)  | 66.3 (63.9-68.8)         | 76.5 (74.4-78.6)         | 10.1 (7.8-12.5) | p < 0.001               |
| No. years with diabetes | ≤5                       | 12095         | 3247 (26.8%) | 63.4 (62.3-64.5)         | 69.5 (68.4-70.5)         | 6.1 (5.1-7.1)   | p < 0.001               |
|                         | 5-10                     | 5557          | 1872 (33.7%) | 65.0 (63.5-66.5)         | 71.4 (70.0-72.8)         | 6.3 (5.0-7.7)   | p < 0.001               |
|                         | >10                      | 4914          | 1859 (37.8%) | 63.5 (61.9-65.1)         | 69.6 (68.1-71.1)         | 6.1 (4.6-7.6)   | p < 0.001               |
| Cataract*               | Present                  | 578           | 158 (27.3%)  | 66.2 (61.2-71.2)         | 69.5 (64.6-74.4)         | 3.3 (-1.7-8.4)  | p = 0.099               |
|                         | Absent                   | 20702         | 6402 (30.9%) | 64.7 (63.9-65.5)         | 69.0 (68.3-69.8)         | 4.4 (3.6-5.2)   | p < 0.001               |
| Pupil diameter*         | Small pupil              | 9759          | 3084 (31.6%) | 64.3 (63.2-65.5)         | 69.3 (68.2-70.4)         | 5.0 (3.8-6.2)   | p < 0.001               |
|                         | Medium pupil             | 12395         | 3817 (30.8%) | 65.2 (64.2-66.2)         | 69.5 (68.5-70.5)         | 4.3 (3.3-5.3)   | p < 0.001               |
|                         | Large pupil              | 6809          | 1993 (29.3%) | 65.4 (64.0-66.8)         | 69.2 (67.8-70.5)         | 3.8 (2.5-5.1)   | p < 0.001               |
| Site by camera type     | Model A                  | 9044          | 2827 (31.3%) | 66.3 (65.1-67.5)         | 71.4 (70.3-72.6)         | 5.1 (4.0-6.2)   | p < 0.001               |
|                         | Model B                  | 2162          | 610 (28.2%)  | 67.4 (64.9-70.0)         | 68.2 (65.7-70.8)         | 0.8 (-1.9-3.6)  | p = 0.284               |

\*Because two eyes of the same patient can have different cataract statuses and pupil sizes, for this analysis we selected a random eye that fit this criteria per patient. In other words, in contrast to other analysis in this paper, these HbA1c predictions are from a single eye instead of being the average of two eyes.

**Supplementary Table 6 | Subgroup analysis for Tch ≥ 240 in validation set A.**

Note that the sum of some subgroups can exceed the total because some patients have multiple visits over time that can fall under different groups. None of the subgroups' DLS AUC decreased by >5% compared to the entire cohort.

| Category                | Subgroup                 | No. of visits |              | AUC (%) (95% CI)         |                          |                 |                         |
|-------------------------|--------------------------|---------------|--------------|--------------------------|--------------------------|-----------------|-------------------------|
|                         |                          | Total         | Positive (%) | Baseline characteristics | DLS (external eye image) | Improvement     | P-value for improvement |
| All                     |                          | 9318          | 984 (10.6%)  | 55.1 (53.3-56.9)         | 59.1 (57.3-61.0)         | 4.0 (1.8-6.3)   | p < 0.001               |
| Age                     | ≤50 years old            | 3272          | 391 (11.9%)  | 49.4 (46.4-52.5)         | 59.4 (56.3-62.5)         | 10.0 (5.7-14.2) | p < 0.001               |
|                         | 50-60 years old          | 3184          | 371 (11.7%)  | 56.0 (53.0-58.9)         | 58.2 (55.2-61.3)         | 2.3 (-1.6-6.1)  | p = 0.123               |
|                         | >60 years old            | 3044          | 238 (7.8%)   | 54.7 (50.8-58.6)         | 56.6 (52.9-60.3)         | 1.9 (-2.8-6.6)  | p = 0.209               |
| Sex                     | Male                     | 4357          | 440 (10.1%)  | 56.1 (53.5-58.8)         | 62.3 (59.7-65.0)         | 6.2 (3.2-9.2)   | p < 0.001               |
|                         | Female                   | 4955          | 534 (10.8%)  | 54.2 (51.7-56.8)         | 57.6 (55.0-60.1)         | 3.3 (0.1-6.6)   | p = 0.021               |
| Race / ethnicity        | Hispanic                 | 3699          | 397 (10.7%)  | 56.0 (53.0-58.9)         | 61.3 (58.4-64.2)         | 5.4 (1.7-9.1)   | p = 0.002               |
|                         | White                    | 2355          | 287 (12.2%)  | 54.0 (50.6-57.4)         | 57.7 (54.2-61.2)         | 3.7 (-0.5-8.0)  | p = 0.043               |
|                         | Black                    | 2102          | 204 (9.7%)   | 53.9 (49.8-57.9)         | 54.2 (49.9-58.5)         | 0.3 (-4.9-5.5)  | p = 0.455               |
|                         | Asian / Pacific islander | 809           | 60 (7.4%)    | 58.5 (50.2-66.7)         | 64.5 (57.5-71.6)         | 6.1 (-3.7-15.9) | p = 0.113               |
| No. years with diabetes | ≤5                       | 5146          | 583 (11.3%)  | 53.1 (50.7-55.5)         | 58.1 (55.6-60.5)         | 4.9 (2.1-7.8)   | p < 0.001               |
|                         | 5-10                     | 2559          | 249 (9.7%)   | 55.7 (51.9-59.5)         | 58.8 (55.3-62.4)         | 3.1 (-1.1-7.4)  | p = 0.074               |
|                         | >10                      | 2262          | 206 (9.1%)   | 56.6 (52.6-60.7)         | 63.1 (59.0-67.1)         | 6.4 (1.7-11.1)  | p = 0.004               |
| Cataract                | Present                  | 229           | 19 (8.3%)*   | 50.1 (36.5-63.7)         | 69.2 (59.4-79.1)         | 19.1 (5.9-32.3) | p = 0.002               |
|                         | Absent                   | 9150          | 984 (10.8%)  | 55.3 (53.4-57.1)         | 59.1 (57.3-61.0)         | 3.9 (1.6-6.1)   | p < 0.001               |
| HbA1c (%)               | ≤7                       | 3698          | 277 (7.5%)   | 54.4 (51.1-57.7)         | 57.3 (53.8-60.7)         | 2.9 (-1.0-6.7)  | p = 0.072               |
|                         | 7-9                      | 3445          | 310 (9.0%)   | 56.3 (53.0-59.5)         | 60.2 (56.8-63.6)         | 3.9 (0.2-7.6)   | p = 0.018               |
|                         | >9                       | 2806          | 454 (16.2%)  | 55.4 (52.6-58.2)         | 57.7 (54.9-60.5)         | 2.3 (-1.4-6.0)  | p = 0.109               |
| Pupil diameter          | Small pupil              | 4682          | 499 (10.7%)  | 54.1 (51.5-56.8)         | 56.8 (54.1-59.5)         | 2.6 (-0.6-5.9)  | p = 0.053               |
|                         | Medium pupil             | 5334          | 549 (10.3%)  | 55.7 (53.3-58.1)         | 59.5 (57.1-62.0)         | 3.8 (0.7-6.9)   | p = 0.008               |
|                         | Large pupil              | 2842          | 317 (11.2%)  | 58.1 (55.0-61.1)         | 60.5 (57.3-63.8)         | 2.5 (-1.4-6.3)  | p = 0.106               |
| Site by camera type     | Model A                  | 3469          | 322 (9.3%)   | 56.0 (52.9-59.1)         | 63.2 (60.0-66.4)         | 7.2 (3.5-10.8)  | p < 0.001               |
|                         | Model B                  | 2069          | 221 (10.7%)  | 51.0 (47.2-54.9)         | 52.9 (48.7-57.1)         | 1.8 (-3.4-7.1)  | p = 0.244               |

\*Note: fewer than 50 positive examples.

**Supplementary Table 7 | Subgroup analysis for Tg ≥ 200 in validation set A.**

Note that the sum of some subgroups can exceed the total because some patients have multiple visits over time that can fall under different groups. Bold indicates there is a >5% decrease in AUC for the DLS in that subgroup compared to the entire cohort.

| Category                | Subgroup                 | No. of visits |              | AUC (%) (95% CI)         |                          |                 |                         |
|-------------------------|--------------------------|---------------|--------------|--------------------------|--------------------------|-----------------|-------------------------|
|                         |                          | Total         | Positive (%) | Baseline characteristics | DLS (external eye image) | Improvement     | P-value for improvement |
| All                     |                          | 9104          | 2894 (31.8%) | 61.7 (60.5-62.9)         | 63.6 (62.4-64.8)         | 1.9 (0.9-2.9)   | p < 0.001               |
| Age                     | ≤50 years old            | 3144          | 1160 (36.9%) | 58.4 (56.4-60.4)         | 60.0 (58.0-62.1)         | 1.6 (-0.2-3.5)  | p = 0.037               |
|                         | 50-60 years old          | 3111          | 994 (32.0%)  | 61.7 (59.6-63.7)         | 64.7 (62.7-66.8)         | 3.1 (1.3-4.8)   | p < 0.001               |
|                         | >60 years old            | 3037          | 799 (26.3%)  | 61.6 (59.4-63.8)         | 63.8 (61.7-66.0)         | 2.2 (0.3-4.1)   | p = 0.012               |
| Sex                     | Male                     | 4247          | 1461 (34.4%) | 61.1 (59.4-62.9)         | 64.4 (62.7-66.2)         | 3.3 (1.9-4.7)   | p < 0.001               |
|                         | Female                   | 4849          | 1451 (29.9%) | 61.9 (60.2-63.6)         | 62.5 (60.9-64.2)         | 0.7 (-0.8-2.1)  | p = 0.190               |
| Race / ethnicity        | Hispanic                 | 3502          | 1229 (35.1%) | 56.2 (54.2-58.2)         | 58.9 (57.0-60.9)         | 2.7 (0.5-5.0)   | p = 0.009               |
|                         | White                    | 2338          | 924 (39.5%)  | 55.2 (52.9-57.6)         | 59.8 (57.4-62.1)         | 4.5 (1.7-7.3)   | p < 0.001               |
|                         | Black                    | 2105          | 421 (20.0%)  | 61.5 (58.5-64.5)         | <b>58.2 (55.2-61.1)</b>  | -3.3 (-7.0-0.4) | p = 0.960               |
|                         | Asian / Pacific islander | 813           | 198 (24.4%)  | 58.2 (53.6-62.8)         | 59.5 (54.9-64.1)         | 1.3 (-3.6-6.2)  | p = 0.303               |
| No. years with diabetes | ≤5                       | 5041          | 1722 (34.2%) | 61.7 (60.1-63.3)         | 62.3 (60.7-63.9)         | 0.7 (-0.6-1.9)  | p = 0.157               |
|                         | 5-10                     | 2497          | 742 (29.7%)  | 61.9 (59.5-64.2)         | 65.1 (62.8-67.4)         | 3.2 (1.3-5.2)   | p < 0.001               |
|                         | >10                      | 2212          | 641 (29.0%)  | 61.3 (58.8-63.8)         | 64.8 (62.3-67.3)         | 3.5 (1.4-5.6)   | p < 0.001               |
| Cataract                | Present                  | 224           | 58 (25.9%)   | 68.7 (61.2-76.2)         | 72.3 (65.1-79.5)         | 3.6 (-3.4-10.6) | p = 0.156               |
|                         | Absent                   | 8936          | 2870 (32.1%) | 61.6 (60.4-62.8)         | 63.3 (62.1-64.5)         | 1.7 (0.7-2.8)   | p < 0.001               |
| HbA1c (%)               | ≤7                       | 3634          | 880 (24.2%)  | 61.7 (59.7-63.8)         | 63.0 (61.0-65.1)         | 1.3 (-0.4-2.9)  | p = 0.066               |
|                         | 7-9                      | 3380          | 1116 (33.0%) | 61.2 (59.2-63.1)         | 63.0 (61.1-65.0)         | 1.9 (0.2-3.5)   | p = 0.012               |
|                         | >9                       | 2703          | 1115 (41.3%) | 61.0 (58.9-63.2)         | 61.9 (59.7-64.0)         | 0.8 (-1.0-2.7)  | p = 0.188               |
| Pupil diameter          | Small pupil              | 4567          | 1399 (30.6%) | 62.9 (61.2-64.6)         | 64.2 (62.5-65.9)         | 1.3 (-0.1-2.7)  | p = 0.035               |
|                         | Medium pupil             | 5217          | 1655 (31.7%) | 61.1 (59.5-62.7)         | 62.2 (60.6-63.8)         | 1.1 (-0.3-2.5)  | p = 0.061               |
|                         | Large pupil              | 2776          | 955 (34.4%)  | 60.5 (58.3-62.7)         | 62.2 (60.0-64.4)         | 1.7 (-0.2-3.6)  | p = 0.042               |
| Site by camera type     | Model A                  | 3421          | 1161 (33.9%) | 60.4 (58.5-62.4)         | 62.2 (60.3-64.2)         | 1.8 (-0.0-3.6)  | p = 0.027               |
|                         | Model B                  | 2068          | 587 (28.4%)  | 62.4 (59.8-65.1)         | 62.1 (59.4-64.8)         | -0.3 (-2.4-1.7) | p = 0.624               |

**Supplementary Table 8 | Subgroup analysis for moderate+ diabetic retinopathy (DR) in validation set A.**

Note that the sum of some subgroups can exceed the total because some patients have multiple visits over time that can fall under different groups. Bold indicates there is a >5% decrease in AUC for the DLS in that subgroup compared to the entire cohort.

| Category                | Subgroup                 | No. of visits |              | AUC (%) (95% CI)         |                          |                  |                         |
|-------------------------|--------------------------|---------------|--------------|--------------------------|--------------------------|------------------|-------------------------|
|                         |                          | Total         | Positive (%) | Baseline characteristics | DLS (external eye image) | Improvement      | P-value for improvement |
| All                     |                          | 26950         | 3247 (12.0%) | 71.0 (70.0-72.0)         | 75.0 (74.1-75.9)         | 4.0 (2.8-5.2)    | p < 0.001               |
| Age                     | ≤50 years old            | 10075         | 1198 (11.9%) | 74.1 (72.6-75.6)         | 77.0 (75.6-78.4)         | 2.9 (1.1-4.7)    | p < 0.001               |
|                         | 50-60 years old          | 8937          | 1118 (12.5%) | 69.8 (68.1-71.5)         | 73.6 (72.0-75.1)         | 3.8 (1.8-5.8)    | p < 0.001               |
|                         | >60 years old            | 8415          | 911 (10.8%)  | 69.6 (67.8-71.4)         | 73.9 (72.3-75.6)         | 4.3 (2.0-6.6)    | p < 0.001               |
| Sex                     | Male                     | 12659         | 1650 (13.0%) | 70.2 (68.8-71.6)         | 75.0 (73.8-76.2)         | 4.8 (3.1-6.5)    | p < 0.001               |
|                         | Female                   | 14301         | 1520 (10.6%) | 71.1 (69.6-72.5)         | 75.8 (74.6-77.1)         | 4.8 (3.1-6.5)    | p < 0.001               |
| Race / ethnicity        | Hispanic                 | 11177         | 1456 (13.0%) | 71.6 (70.1-73.0)         | 77.1 (75.8-78.3)         | 5.5 (3.8-7.2)    | p < 0.001               |
|                         | White                    | 7528          | 715 (9.5%)   | 72.2 (70.1-74.2)         | 73.9 (72.0-75.8)         | 1.7 (-0.8-4.3)   | p = 0.087               |
|                         | Black                    | 4094          | 470 (11.5%)  | 68.2 (65.7-70.8)         | <b>68.7 (66.1-71.3)</b>  | 0.5 (-2.7-3.7)   | p = 0.386               |
|                         | Asian / Pacific islander | 2882          | 354 (12.3%)  | 65.5 (62.3-68.6)         | 77.7 (75.2-80.3)         | 12.3 (8.6-16.0)  | p < 0.001               |
| No. years with diabetes | ≤5                       | 15059         | 922 (6.1%)   | 59.7 (57.8-61.6)         | 74.8 (73.1-76.4)         | 15.1 (12.8-17.3) | p < 0.001               |
|                         | 5-10                     | 7023          | 882 (12.6%)  | 60.2 (58.2-62.2)         | 73.5 (71.8-75.3)         | 13.3 (10.9-15.8) | p < 0.001               |
|                         | >10                      | 6457          | 1565 (24.2%) | 60.0 (58.4-61.5)         | 71.8 (70.4-73.3)         | 11.9 (9.9-13.8)  | p < 0.001               |
| Cataract                | Present                  | 656           | 71 (10.8%)   | 66.4 (59.3-73.5)         | 73.5 (67.9-79.1)         | 7.1 (-1.3-15.6)  | p = 0.049               |
|                         | Absent                   | 26413         | 3099 (11.7%) | 71.1 (70.2-72.1)         | 75.5 (74.6-76.4)         | 4.4 (3.2-5.6)    | p < 0.001               |
| HbA1c (%)               | ≤7                       | 8130          | 360 (4.4%)   | 66.8 (63.7-69.8)         | 71.8 (68.9-74.6)         | 5.0 (1.5-8.5)    | p = 0.003               |
|                         | 7-9                      | 7972          | 990 (12.4%)  | 68.7 (66.9-70.5)         | 73.7 (72.0-75.4)         | 5.0 (2.7-7.2)    | p < 0.001               |
|                         | >9                       | 6665          | 1361 (20.4%) | 67.8 (66.2-69.4)         | 72.1 (70.6-73.6)         | 4.3 (2.3-6.3)    | p < 0.001               |
| Pupil diameter          | Small pupil              | 12120         | 1630 (13.4%) | 69.2 (67.9-70.6)         | 73.9 (72.6-75.2)         | 4.7 (3.0-6.4)    | p < 0.001               |
|                         | Medium pupil             | 15819         | 1938 (12.3%) | 70.7 (69.4-71.9)         | 75.3 (74.2-76.5)         | 4.7 (3.1-6.2)    | p < 0.001               |
|                         | Large pupil              | 8756          | 744 (8.5%)   | 72.9 (70.9-74.9)         | 75.8 (74.0-77.6)         | 2.8 (0.5-5.2)    | p = 0.009               |
| Site by camera type     | Model A                  | 12114         | 1431 (11.8%) | 71.8 (70.4-73.3)         | 76.5 (75.2-77.7)         | 4.6 (2.9-6.4)    | p < 0.001               |
|                         | Model B                  | 2384          | 249 (10.4%)  | 69.5 (66.0-73.0)         | 73.4 (70.2-76.5)         | 3.8 (-0.4-8.1)   | p = 0.038               |

**Supplementary Table 9 | Subgroup analysis for diabetic macular edema (DME) in validation set A.**

Note that the sum of some subgroups can exceed the total because some patients have multiple visits over time that can fall under different groups. None of the subgroups' DLS AUC decreased by >5% compared to the entire cohort.

| Category                | Subgroup                 | No. of visits |              | AUC (%) (95% CI)         |                          |                  |                         |
|-------------------------|--------------------------|---------------|--------------|--------------------------|--------------------------|------------------|-------------------------|
|                         |                          | Total         | Positive (%) | Baseline characteristics | DLS (external eye image) | Improvement      | P-value for improvement |
| All                     |                          | 26950         | 797 (3.0%)   | 71.2 (69.4-73.0)         | 77.9 (76.3-79.5)         | 6.7 (4.6-8.9)    | p < 0.001               |
| Age                     | ≤50 years old            | 10075         | 280 (2.8%)   | 73.5 (70.5-76.5)         | 78.0 (75.3-80.6)         | 4.5 (1.0-8.0)    | p = 0.006               |
|                         | 50-60 years old          | 8937          | 301 (3.4%)   | 69.5 (66.6-72.4)         | 77.7 (75.0-80.4)         | 8.2 (4.6-11.8)   | p < 0.001               |
|                         | >60 years old            | 8415          | 230 (2.7%)   | 68.3 (64.9-71.7)         | 74.6 (71.2-77.9)         | 6.3 (1.9-10.7)   | p = 0.003               |
| Sex                     | Male                     | 12659         | 426 (3.4%)   | 67.7 (65.1-70.4)         | 76.5 (74.3-78.7)         | 8.8 (5.7-11.9)   | p < 0.001               |
|                         | Female                   | 14301         | 404 (2.8%)   | 72.6 (70.2-75.0)         | 77.8 (75.5-80.1)         | 5.2 (2.2-8.2)    | p < 0.001               |
| Race / ethnicity        | Hispanic                 | 11177         | 361 (3.2%)   | 70.5 (67.8-73.1)         | 79.4 (77.1-81.7)         | 8.9 (5.8-12.0)   | p < 0.001               |
|                         | White                    | 7528          | 153 (2.0%)   | 72.2 (68.3-76.1)         | 74.6 (70.6-78.6)         | 2.4 (-2.6-7.5)   | p = 0.171               |
|                         | Black                    | 4094          | 146 (3.6%)   | 69.9 (65.5-74.2)         | 74.5 (70.5-78.4)         | 4.6 (-0.9-10.1)  | p = 0.051               |
|                         | Asian / Pacific islander | 2882          | 93 (3.2%)    | 69.2 (63.8-74.6)         | 80.4 (75.6-85.3)         | 11.3 (5.0-17.5)  | p < 0.001               |
| No. years with diabetes | ≤5                       | 15059         | 219 (1.5%)   | 61.5 (57.7-65.3)         | 78.3 (75.3-81.4)         | 16.8 (12.2-21.4) | p < 0.001               |
|                         | 5-10                     | 7023          | 204 (2.9%)   | 56.9 (52.9-60.9)         | 77.5 (74.6-80.5)         | 20.7 (16.1-25.3) | p < 0.001               |
|                         | >10                      | 6457          | 412 (6.4%)   | 58.3 (55.5-61.2)         | 73.1 (70.7-75.6)         | 14.8 (11.4-18.1) | p < 0.001               |
| Cataract                | Present                  | 656           | 14 (2.1%)*   | 61.6 (45.4-77.8)         | 74.9 (59.9-89.8)         | 13.3 (-6.7-33.3) | p = 0.097               |
|                         | Absent                   | 26413         | 798 (3.0%)   | 71.5 (69.7-73.3)         | 77.5 (75.9-79.1)         | 6.0 (3.9-8.1)    | p < 0.001               |
| HbA1c (%)               | ≤7                       | 8130          | 62 (0.8%)    | 68.2 (61.0-75.3)         | 74.2 (68.1-80.4)         | 6.1 (-1.9-14.1)  | p = 0.067               |
|                         | 7-9                      | 7972          | 233 (2.9%)   | 68.1 (64.6-71.5)         | 78.0 (75.0-81.0)         | 9.9 (5.7-14.2)   | p < 0.001               |
|                         | >9                       | 6665          | 340 (5.1%)   | 66.8 (64.0-69.7)         | 75.2 (72.6-77.8)         | 8.4 (4.9-11.9)   | p < 0.001               |
| Pupil diameter          | Small pupil              | 12120         | 407 (3.4%)   | 68.1 (65.6-70.7)         | 77.4 (75.2-79.6)         | 9.3 (6.1-12.5)   | p < 0.001               |
|                         | Medium pupil             | 15819         | 488 (3.1%)   | 69.7 (67.4-72.1)         | 76.9 (74.8-79.1)         | 7.2 (4.4-10.0)   | p < 0.001               |
|                         | Large pupil              | 8756          | 160 (1.8%)   | 74.7 (70.7-78.7)         | 78.3 (74.4-82.1)         | 3.6 (-1.0-8.1)   | p = 0.064               |
| Site by camera type     | Model A                  | 12114         | 346 (2.9%)   | 70.9 (68.1-73.6)         | 79.6 (77.2-82.0)         | 8.7 (5.4-12.0)   | p < 0.001               |
|                         | Model B                  | 2384          | 62 (2.6%)    | 68.5 (61.6-75.4)         | 74.3 (68.2-80.3)         | 5.8 (-2.0-13.6)  | p = 0.074               |

\*Note: fewer than 50 positive examples.

**Supplementary Table 10 | Subgroup analysis for vision-threatening diabetic retinopathy (VTDR) in validation set A.**

Note that the sum of some subgroups can exceed the total because some patients have multiple visits over time that can fall under different groups. Bold indicates there is a >5% decrease in AUC for the DLS in that subgroup compared to the entire cohort.

| Category                | Subgroup                 | No. of visits |              | AUC (%) (95% CI)         |                          |                  |                         |
|-------------------------|--------------------------|---------------|--------------|--------------------------|--------------------------|------------------|-------------------------|
|                         |                          | Total         | Positive (%) | Baseline characteristics | DLS (external eye image) | Improvement      | P-value for improvement |
| All                     |                          | 26950         | 1042 (3.9%)  | 72.7 (71.1-74.2)         | 79.2 (77.9-80.5)         | 6.5 (4.6-8.4)    | p < 0.001               |
| Age                     | ≤50 years old            | 10075         | 368 (3.7%)   | 75.5 (73.0-78.1)         | 80.1 (77.9-82.4)         | 4.6 (1.6-7.7)    | p = 0.001               |
|                         | 50-60 years old          | 8937          | 381 (4.3%)   | 70.2 (67.5-72.8)         | 79.2 (76.9-81.5)         | 9.1 (5.9-12.3)   | p < 0.001               |
|                         | >60 years old            | 8415          | 313 (3.7%)   | 71.8 (69.0-74.7)         | 76.1 (73.3-78.8)         | 4.2 (0.6-7.9)    | p = 0.011               |
| Sex                     | Male                     | 12659         | 565 (4.5%)   | 70.7 (68.5-72.9)         | 77.4 (75.5-79.3)         | 6.7 (4.0-9.4)    | p < 0.001               |
|                         | Female                   | 14301         | 514 (3.6%)   | 73.4 (71.2-75.6)         | 79.7 (77.7-81.6)         | 6.3 (3.6-8.9)    | p < 0.001               |
| Race / ethnicity        | Hispanic                 | 11177         | 457 (4.1%)   | 71.4 (69.0-73.8)         | 80.6 (78.7-82.6)         | 9.2 (6.4-12.0)   | p < 0.001               |
|                         | White                    | 7528          | 211 (2.8%)   | 74.7 (71.4-78.0)         | 77.5 (74.3-80.6)         | 2.7 (-1.5-6.9)   | p = 0.101               |
|                         | Black                    | 4094          | 176 (4.3%)   | 70.8 (66.9-74.8)         | 74.2 (70.6-77.7)         | 3.4 (-1.6-8.3)   | p = 0.093               |
|                         | Asian / Pacific islander | 2882          | 141 (4.9%)   | 69.1 (64.5-73.8)         | 81.9 (78.2-85.6)         | 12.7 (7.6-17.9)  | p < 0.001               |
| No. years with diabetes | ≤5                       | 15059         | 265 (1.8%)   | 61.7 (58.3-65.1)         | 79.9 (77.3-82.6)         | 18.2 (14.1-22.4) | p < 0.001               |
|                         | 5-10                     | 7023          | 253 (3.6%)   | 56.9 (53.3-60.6)         | 77.6 (75.0-80.3)         | 20.7 (16.4-25.0) | p < 0.001               |
|                         | >10                      | 6457          | 570 (8.8%)   | 60.8 (58.4-63.2)         | <b>74.0 (72.0-76.1)</b>  | 13.2 (10.3-16.1) | p < 0.001               |
| Cataract                | Present                  | 656           | 20 (3.0%)*   | 68.5 (54.8-82.1)         | 74.6 (63.4-85.9)         | 6.2 (-10.0-22.3) | p = 0.227               |
|                         | Absent                   | 26413         | 1039 (3.9%)  | 72.5 (70.9-74.1)         | 79.3 (77.9-80.6)         | 6.8 (4.9-8.7)    | p < 0.001               |
| HbA1c (%)               | ≤7                       | 8130          | 93 (1.1%)    | 69.3 (63.2-75.4)         | 76.9 (72.1-81.7)         | 7.6 (0.7-14.6)   | p = 0.016               |
|                         | 7-9                      | 7972          | 297 (3.7%)   | 70.4 (67.4-73.5)         | 79.4 (76.9-82.0)         | 9.0 (5.3-12.7)   | p < 0.001               |
|                         | >9                       | 6665          | 446 (6.7%)   | 68.4 (65.9-71.0)         | 75.6 (73.4-77.9)         | 7.2 (4.1-10.4)   | p < 0.001               |
| Pupil diameter          | Small pupil              | 12120         | 548 (4.5%)   | 70.0 (67.7-72.2)         | 78.1 (76.3-80.0)         | 8.2 (5.4-10.9)   | p < 0.001               |
|                         | Medium pupil             | 15819         | 632 (4.0%)   | 72.2 (70.2-74.2)         | 78.5 (76.6-80.3)         | 6.3 (3.8-8.7)    | p < 0.001               |
|                         | Large pupil              | 8756          | 203 (2.3%)   | 74.0 (70.4-77.7)         | 80.3 (77.1-83.5)         | 6.3 (2.1-10.5)   | p = 0.002               |
| Site by camera type     | Model A                  | 12114         | 428 (3.5%)   | 72.4 (69.9-74.8)         | 79.8 (77.7-81.9)         | 7.4 (4.5-10.4)   | p < 0.001               |
|                         | Model B                  | 2384          | 84 (3.5%)    | 71.1 (65.4-76.8)         | 76.2 (71.2-81.3)         | 5.1 (-1.4-11.7)  | p = 0.063               |

\*Note: fewer than 50 positive examples.

**Supplementary Table 11 | Subgroup analysis for cataract in validation set A.**

Note that the sum of some subgroups can exceed the total because some patients have multiple visits over time that can fall under different groups. Bold indicates there is a >5% decrease in AUC for the DLS in that subgroup compared to the entire cohort.

| Category                | Subgroup                 | No. of visits |              | AUC (%) (95% CI)         |                          |                  |                         |
|-------------------------|--------------------------|---------------|--------------|--------------------------|--------------------------|------------------|-------------------------|
|                         |                          | Total         | Positive (%) | Baseline characteristics | DLS (external eye image) | Improvement      | P-value for improvement |
| All                     |                          | 27415         | 639 (2.3%)   | 76.5 (74.7-78.2)         | 86.4 (84.9-87.8)         | 9.9 (8.2-11.6)   | p < 0.001               |
| Age                     | ≤50 years old            | 10198         | 56 (0.5%)    | 63.8 (56.1-71.4)         | 87.3 (81.3-93.2)         | 23.5 (14.3-32.7) | p < 0.001               |
|                         | 50-60 years old          | 9093          | 150 (1.6%)   | 62.3 (57.8-66.8)         | <b>78.7 (74.6-82.9)</b>  | 16.5 (10.9-22.0) | p < 0.001               |
|                         | >60 years old            | 8625          | 448 (5.2%)   | 62.9 (60.4-65.5)         | <b>79.5 (77.2-81.7)</b>  | 16.5 (13.8-19.3) | p < 0.001               |
| Sex                     | Male                     | 12890         | 247 (1.9%)   | 74.1 (71.0-77.1)         | 83.9 (81.4-86.5)         | 9.9 (6.7-13.0)   | p < 0.001               |
|                         | Female                   | 14525         | 390 (2.7%)   | 77.5 (75.5-79.6)         | 87.7 (85.9-89.4)         | 10.2 (8.1-12.2)  | p < 0.001               |
| Race / ethnicity        | Hispanic                 | 11393         | 167 (1.5%)   | 77.2 (73.7-80.7)         | 88.9 (86.4-91.4)         | 11.7 (8.1-15.3)  | p < 0.001               |
|                         | White                    | 7621          | 162 (2.1%)   | 72.2 (68.1-76.2)         | 82.8 (79.3-86.4)         | 10.7 (6.6-14.7)  | p < 0.001               |
|                         | Black                    | 4140          | 90 (2.2%)    | 76.5 (72.4-80.7)         | 83.5 (79.2-87.8)         | 6.9 (2.7-11.2)   | p < 0.001               |
|                         | Asian / Pacific islander | 2949          | 184 (6.2%)   | 72.9 (69.7-76.1)         | 85.9 (83.3-88.5)         | 13.0 (9.6-16.5)  | p < 0.001               |
| No. years with diabetes | ≤5                       | 15204         | 284 (1.9%)   | 78.8 (76.1-81.5)         | 88.2 (86.1-90.4)         | 9.4 (6.8-12.0)   | p < 0.001               |
|                         | 5-10                     | 7137          | 171 (2.4%)   | 72.7 (69.0-76.4)         | 85.5 (82.6-88.4)         | 12.8 (9.0-16.6)  | p < 0.001               |
|                         | >10                      | 6677          | 214 (3.2%)   | 71.5 (68.3-74.6)         | 82.4 (79.6-85.2)         | 10.9 (7.5-14.4)  | p < 0.001               |
| HbA1c (%)               | ≤7                       | 8214          | 223 (2.7%)   | 78.7 (76.0-81.5)         | 88.3 (86.0-90.7)         | 9.6 (7.0-12.2)   | p < 0.001               |
|                         | 7-9                      | 8080          | 194 (2.4%)   | 76.0 (72.6-79.4)         | 87.8 (85.5-90.1)         | 11.7 (8.5-15.0)  | p < 0.001               |
|                         | >9                       | 6825          | 150 (2.2%)   | 75.9 (72.5-79.4)         | 84.8 (81.6-87.9)         | 8.8 (4.8-12.8)   | p < 0.001               |
| Pupil diameter          | Small pupil              | 12488         | 308 (2.5%)   | 73.0 (70.5-75.5)         | <b>79.9 (77.4-82.3)</b>  | 6.9 (4.3-9.4)    | p < 0.001               |
|                         | Medium pupil             | 16009         | 407 (2.5%)   | 75.8 (73.5-78.2)         | 87.6 (85.9-89.4)         | 11.8 (9.5-14.1)  | p < 0.001               |
|                         | Large pupil              | 8798          | 173 (2.0%)   | 80.7 (77.6-83.9)         | 91.1 (88.5-93.6)         | 10.3 (7.4-13.2)  | p < 0.001               |
| Site by camera type     | Model A                  | 12413         | 335 (2.7%)   | 77.1 (74.8-79.4)         | 88.1 (86.4-89.9)         | 11.1 (8.8-13.4)  | p < 0.001               |
|                         | Model B                  | 2384          | 35 (1.5%)*   | 76.1 (67.8-84.5)         | <b>78.2 (71.0-85.4)</b>  | 2.1 (-5.3-9.4)   | p = 0.292               |

\*Note: fewer than 50 positive examples.

**Supplementary Table 12 | Subgroup analysis for HbA1c ≥ 7 in validation set D.**

Note that the sum of some subgroups can exceed the total because some patients have multiple visits over time that can fall under different groups. Bold indicates there is a >5% decrease in AUC for the DLS in that subgroup compared to the entire cohort.

| Category         | Subgroup     | No. of visits |              | AUC (%) (95% CI)         |                          |                  |                         |
|------------------|--------------|---------------|--------------|--------------------------|--------------------------|------------------|-------------------------|
|                  |              | Total         | Positive (%) | Baseline characteristics | DLS (external eye image) | Improvement      | P-value for improvement |
| All              |              | 3200          | 1152 (36.0%) | 55.9 (53.9-57.9)         | 64.3 (62.3-66.3)         | 8.4 (5.3-11.5)   | p < 0.001               |
| Diabetes status  | Diabetic     | 1902          | 1102 (57.9%) | 45.0 (42.3-47.6)         | 62.6 (60.1-65.1)         | 17.6 (13.7-21.6) | p < 0.001               |
|                  | Non-diabetic | 1303          | 52 (4.0%)    | 53.7 (45.8-61.6)         | <b>57.6 (49.2-65.9)</b>  | 3.9 (-8.6-16.3)  | p = 0.271               |
| BMI range        | Normal       | 358           | 77 (21.5%)   | 56.1 (49.0-63.2)         | 71.8 (65.4-78.2)         | 15.8 (4.8-26.7)  | p = 0.002               |
|                  | Overweight   | 981           | 285 (29.1%)  | 55.0 (51.1-58.9)         | 62.3 (58.5-66.2)         | 7.3 (1.4-13.3)   | p = 0.008               |
|                  | Obesity I    | 916           | 364 (39.7%)  | 59.8 (56.1-63.5)         | 64.6 (61.0-68.3)         | 4.9 (-0.7-10.4)  | p = 0.043               |
|                  | Obesity II+  | 711           | 327 (46.0%)  | 59.1 (55.0-63.3)         | 62.7 (58.6-66.8)         | 3.5 (-2.6-9.7)   | p = 0.132               |
| IOL history      | Yes          | 460           | 209 (45.4%)  | 46.9 (41.6-52.2)         | 64.9 (59.8-69.9)         | 18.0 (9.7-26.2)  | p < 0.001               |
|                  | No           | 2740          | 942 (34.4%)  | 55.9 (53.7-58.1)         | 63.7 (61.5-65.9)         | 7.8 (4.4-11.2)   | p < 0.001               |
| Race / ethnicity | Black        | 1733          | 599 (34.6%)  | 57.3 (54.5-60.0)         | 66.0 (63.3-68.7)         | 8.7 (4.6-12.9)   | p < 0.001               |
|                  | White        | 1283          | 488 (38.0%)  | 53.1 (49.8-56.3)         | 62.1 (58.9-65.2)         | 9.0 (4.0-14.0)   | p < 0.001               |



**Supplementary Table 13 | Subgroup analysis for HbA1c ≥ 9 in validation set D.**

Note that the sum of some subgroups can exceed the total because some patients have multiple visits over time that can fall under different groups. Bold indicates there is a >5% decrease in AUC for the DLS in that subgroup compared to the entire cohort.

| Category         | Subgroup     | No. of visits |              | AUC (%) (95% CI)         |                          |                  |                         |
|------------------|--------------|---------------|--------------|--------------------------|--------------------------|------------------|-------------------------|
|                  |              | Total         | Positive (%) | Baseline characteristics | DLS (external eye image) | Improvement      | P-value for improvement |
| All              |              | 3200          | 357 (11.2%)  | 59.8 (56.7-62.8)         | 67.6 (64.7-70.5)         | 7.8 (4.5-11.1)   | p < 0.001               |
| Diabetes status  | Diabetic     | 1902          | 346 (18.2%)  | 65.6 (62.4-68.9)         | 67.9 (64.9-71.0)         | 2.3 (-1.2-5.8)   | p = 0.099               |
|                  | Non-diabetic | 1303          | 9 (0.7%)*    | 60.8 (44.6-77.0)         | <b>62.4 (46.9-78.0)</b>  | 1.6 (-19.4-22.7) | p = 0.440               |
| BMI range        | Normal       | 358           | 30 (8.4%)*   | 57.6 (47.2-68.0)         | 73.1 (64.7-81.5)         | 15.5 (6.2-24.9)  | p < 0.001               |
|                  | Overweight   | 981           | 84 (8.6%)    | 59.3 (52.4-66.2)         | 65.7 (59.7-71.8)         | 6.4 (-0.5-13.3)  | p = 0.034               |
|                  | Obesity I    | 916           | 107 (11.7%)  | 57.7 (52.3-63.0)         | 71.7 (66.8-76.7)         | 14.1 (8.1-20.1)  | p < 0.001               |
|                  | Obesity II+  | 711           | 110 (15.5%)  | 59.5 (54.0-65.0)         | 63.6 (57.9-69.4)         | 4.2 (-2.2-10.6)  | p = 0.100               |
| IOL history      | Yes          | 460           | 51 (11.1%)   | 66.0 (57.5-74.4)         | 67.0 (59.4-74.7)         | 1.1 (-7.7-9.9)   | p = 0.406               |
|                  | No           | 2740          | 307 (11.2%)  | 59.3 (56.1-62.6)         | 67.7 (64.6-70.9)         | 8.4 (4.8-12.0)   | p < 0.001               |
| Race / ethnicity | Black        | 1733          | 243 (14.0%)  | 56.2 (52.4-60.0)         | 65.9 (62.2-69.6)         | 9.6 (5.4-13.9)   | p < 0.001               |
|                  | White        | 1283          | 100 (7.8%)   | 64.6 (58.8-70.3)         | 70.0 (64.9-75.2)         | 5.4 (0.1-10.8)   | p = 0.023               |

**\*Note: fewer than 50 positive examples. Please see analysis on HbA1c ≥ 7 in Supplementary Table 12 for a better powered analysis.**

**Supplementary Table 14 | Hyperparameters.**

(A) common across models and (B) specific to each selected model.

**A**

|                                       |                                    |                    |
|---------------------------------------|------------------------------------|--------------------|
| Hyperparameter                        | DLS (external eye image)           | Pupil / iris model |
| Batch size per TPU core               | 8                                  | 8                  |
| Number of TPU cores                   | 8                                  | 2                  |
| Effective batch size                  | 64                                 | 16                 |
| Moving average decay rate             | 0.9999                             | 0.9999             |
| Max training steps                    | 300000                             | 300000             |
| Input image size [pixels]             | 587 × 587                          | 587 × 587          |
| Random flip                           | Horizontal and vertical            | -                  |
| Random brightness max delta           | 0.1148                             | 0.1148             |
| Random hue max delta                  | 0.0251                             | 0.0251             |
| Random saturation range               | 0.5597 - 1.2749                    | 0.5597 - 1.2749    |
| Random contrast range                 | 0.9997 - 1.7705                    | 0.9997 - 1.7705    |
| Random scale factors                  | 1.0X (60%), 1.3X (20%), 1.5X (20%) | 1.0X (100%)        |
| Dropout rate at final layer           | 0.2                                | 0.2                |
| Weight decay rate (L2 regularization) | 4.0e-05                            | 4.0e-05            |
| Model architecture                    | Inception V3                       | Inception V3       |
| Preinitialization                     | ImageNet                           | ImageNet           |

**B**

| Hyperparameter                  | DLS 1    | DLS 2    | DLS 3    | DLS 4    | DLS 5    | Pupil / iris model |
|---------------------------------|----------|----------|----------|----------|----------|--------------------|
| Optimizer                       | Momentum | Momentum | Momentum | Momentum | Momentum | Momentum           |
| Initial learning rate           | 1.39e-02 | 2.53e-02 | 2.17e-02 | 3.58e-03 | 1.38e-02 | 4.57e-02           |
| Decay steps                     | 10000    | 20000    | 10000    | 50000    | 50000    | 50000              |
| Decay rate                      | 0.662    | 0.545    | 0.610    | 0.956    | 0.685    | 0.725              |
| Pre warm-up learning rate       | 1.39e-03 | 2.53e-03 | 2.17e-03 | 3.58e-04 | 1.38e-03 | 1.39e-03           |
| Warm up steps                   | 4000     | 4000     | 4000     | 4000     | 4000     | 4000               |
| Training steps (early stopping) | 52000    | 90000    | 78000    | 80000    | 136000   | 298000             |

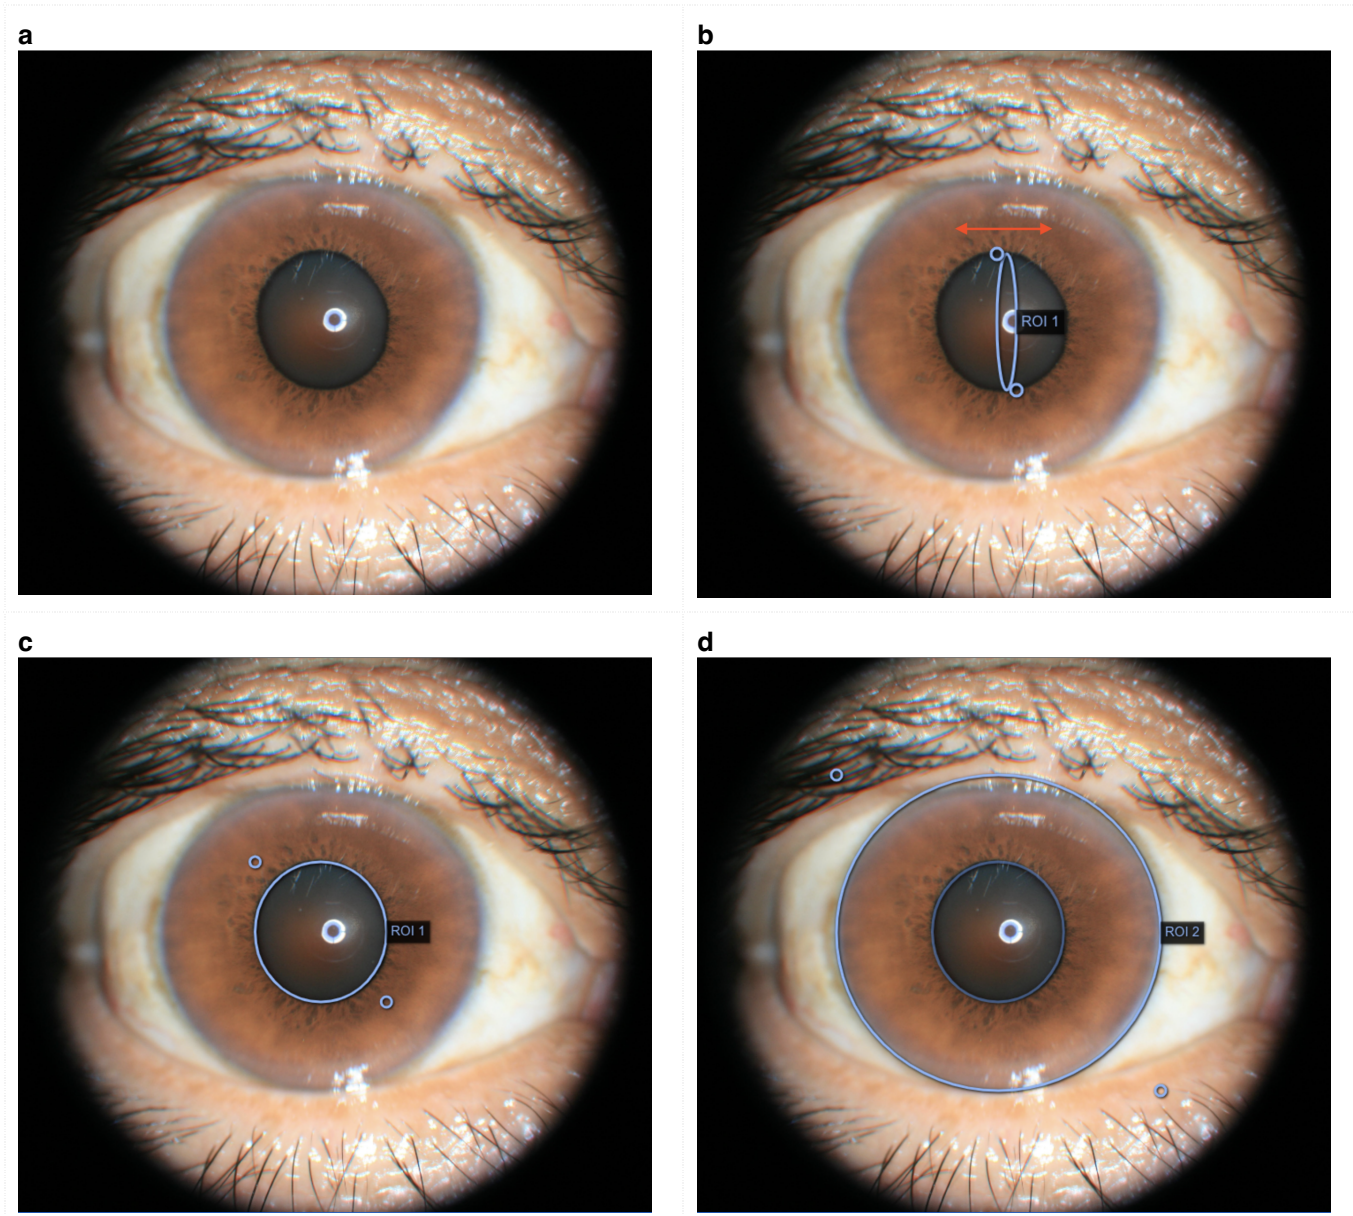

**Supplementary Figure 1. Pupil / iris segmentation tool.**

The segmentation tool involved drawing ellipses using a custom click and drag interface (A-C), to produce two ellipses: one around the pupil and another around the iris (D).

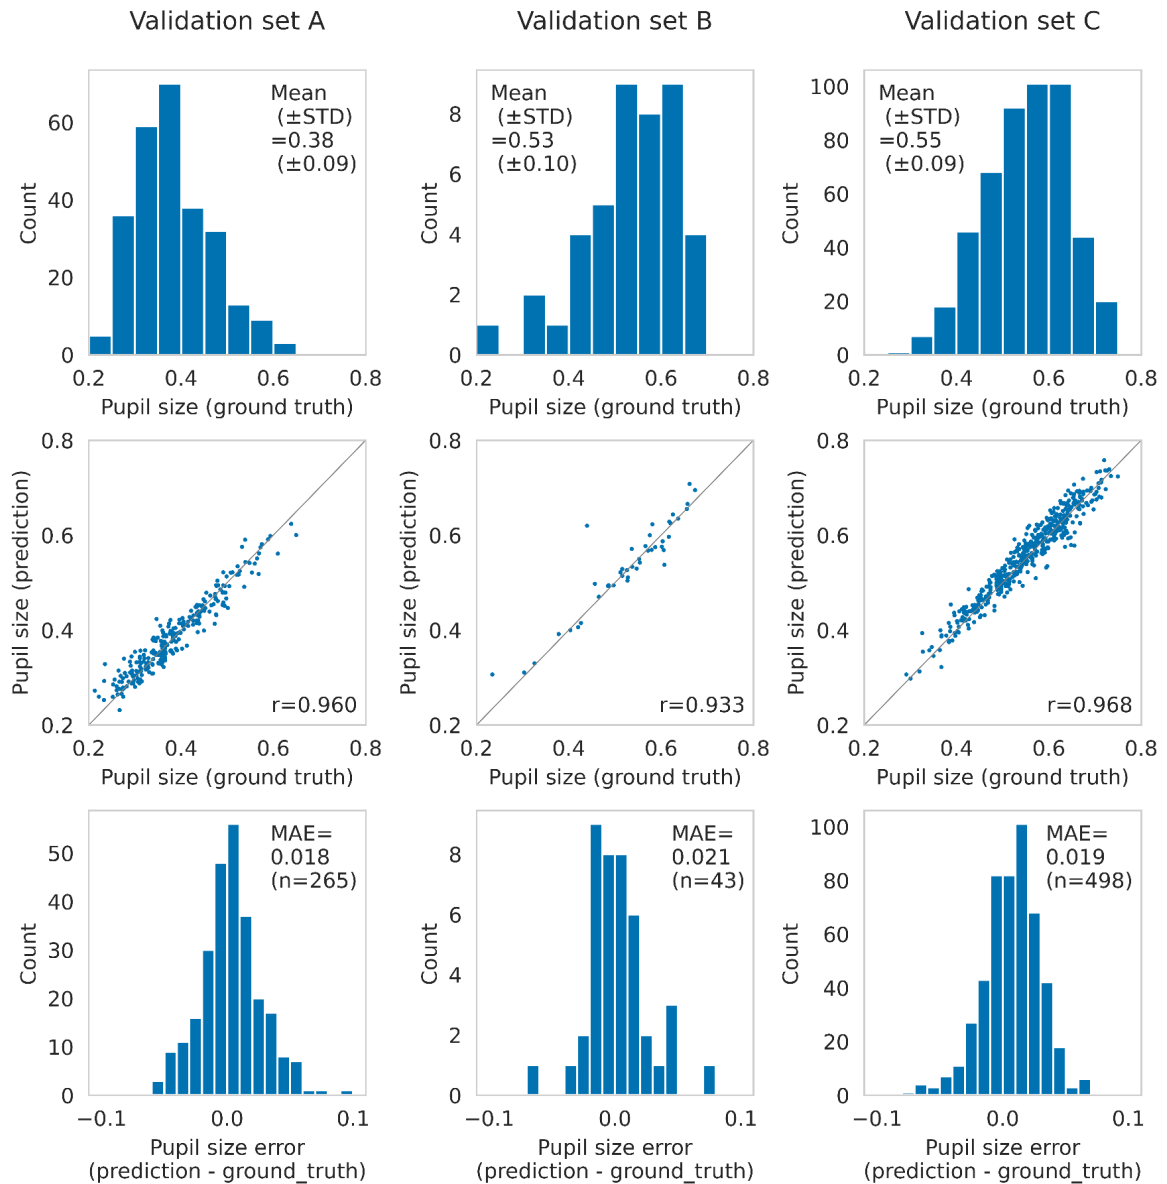

**Supplementary Figure 2. Accuracy of pupil size predictions by pupil/iris segmentation model.**

Pupil size is represented as a fraction: the pupil radius divided by the iris radius. (Top row) Distribution of ground truth pupil size in each dataset. Note that validation set A contained non-dilated pupils, whereas pupils in validation sets B and C were dilated. (Middle row) Joint distribution of ground truth and predicted pupil size. Text indicates Pearson’s correlation coefficient ( $r$ ). (Bottom row) Distribution of errors (difference between predicted and ground truth pupil size). Abbreviations: STD = standard deviation, MAE = mean absolute error.
